# Supplementary material for: The effect of histidine behaviors on the structural properties of Aβ(1–42) peptide in protonation stage one, two, and three
Source: Royal Society of Chemistry journal article supplement (doi:10.1039/d3cp01405c), 2023-01-01
Supplement: d3cp01405c1.pdf [file d3cp01405c1.pdf]

## Supplementary Material

### Histidine Behaviors Effect on Structural Properties of A $\beta$ (1-42) Peptide in Protonation Stage of One, Two, and Three

Yue Sun<sup>a</sup>, Changgui Li<sup>a</sup>, Jinping Wang<sup>c,\*</sup>, Hu Shi<sup>a,b,\*</sup>

<sup>a</sup> School of Chemistry and Chemical Engineering, Shanxi University, Taiyuan 030006, China.

<sup>b</sup> Institute of Molecular Science, Shanxi University, Taiyuan 030006, China.

<sup>c</sup> Institute of Surface Analysis and Chemical Biology, University of Jinan, Jinan, Shandong 250022, P. R. China

Corresponding author: \*Email: hshi@sxu.edu.cn (H. Shi) Email: ila\_wangjp@ujn.edu.cn (J. Wang)

Figure S1. The convergence of our REMD simulations.

Table S1. Basic information of our REMD simulations and the averaged  $\beta$ -sheet contents in each system.

Table S2. Probability distributions of secondary structure in each system.

Figure S2. The contact map in each system.

Table S3. Possibility of H-bonding interaction between H6 and other residues in each system.

Table S4. Possibility of H-bonding interaction between H13 and other residues in each system.

Table S5. Possibility of H-bonding interaction between H14 and other residues in each system.

Table S6. The calculation of pKa for all three histidines in each system.

Table S7. PCC and RMSD between our REMD-Calculated and Experimental  $^3J_{\text{HNHA}}$ -Coupling Constants.

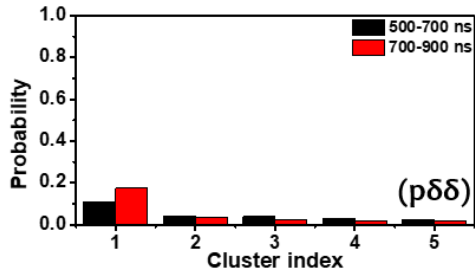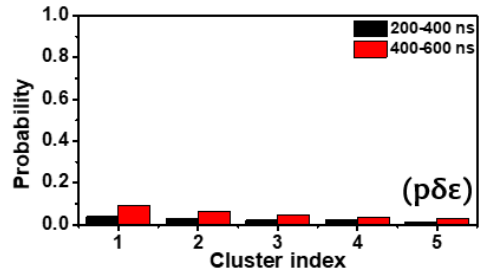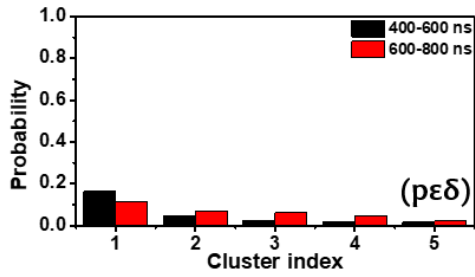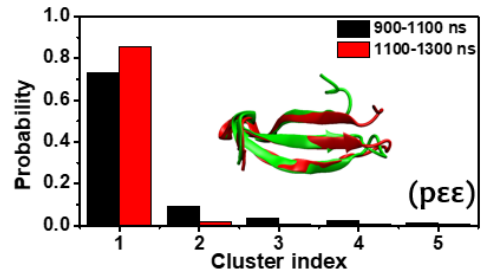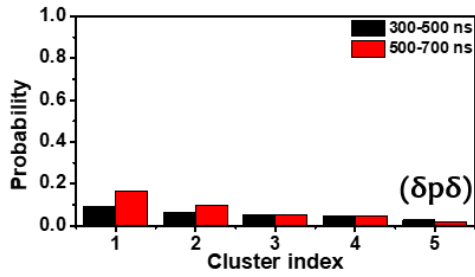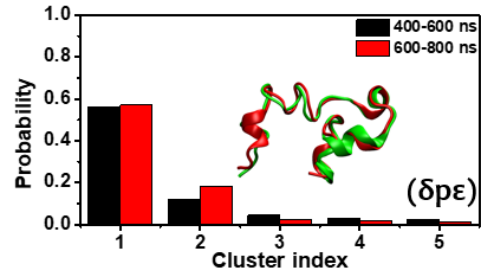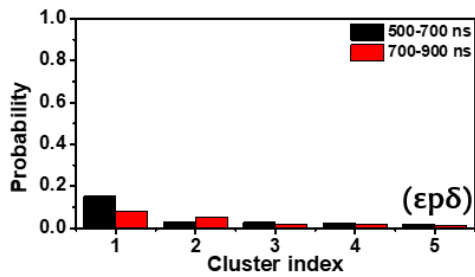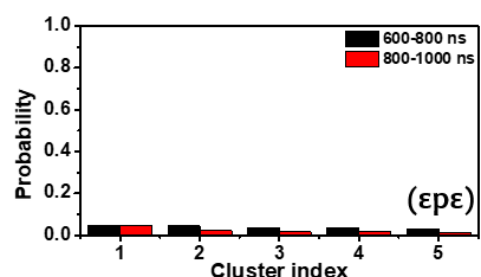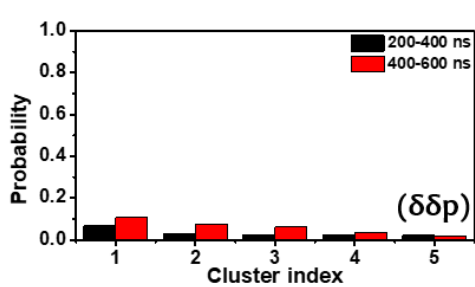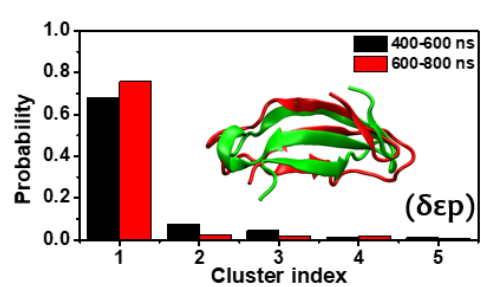

Figure S1. The convergence of our REMD simulations.

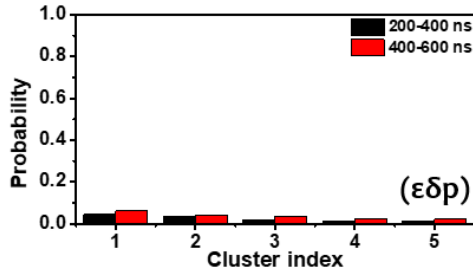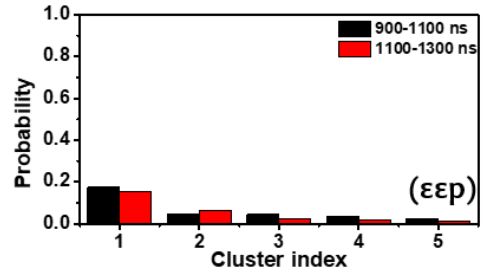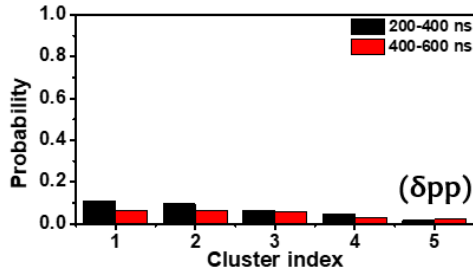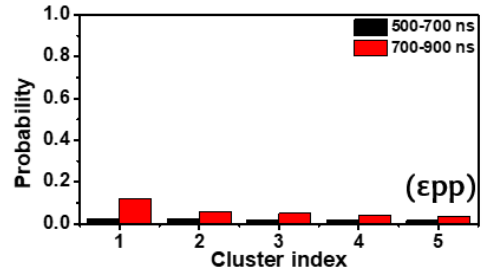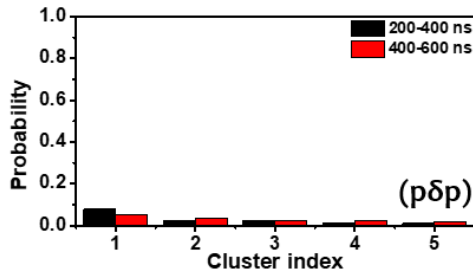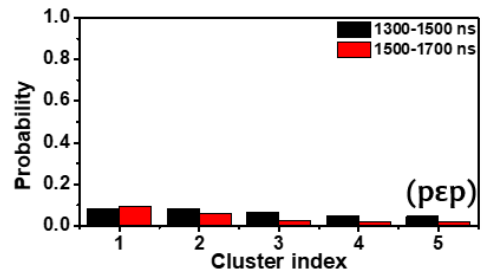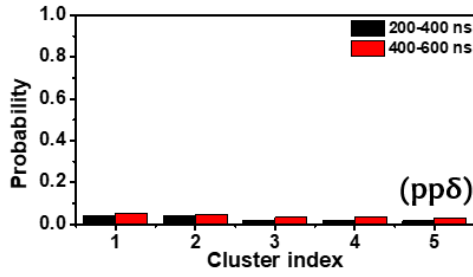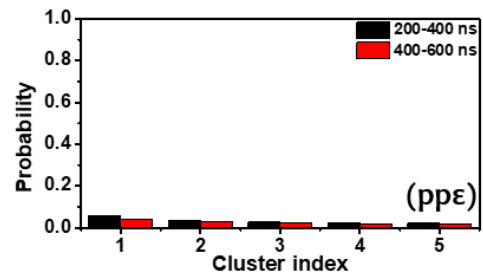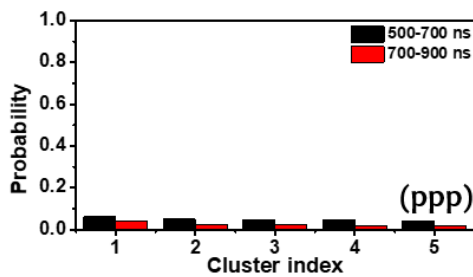

Figure S1. (Continuous figure)

Table S1. Basic information of our REMD simulations and the averaged  $\beta$ -sheet contents in each system.

| Systems                     | REMD times (ns) | Convergence (ns) | Frames | Averaged $\beta$ -sheet contents |
|-----------------------------|-----------------|------------------|--------|----------------------------------|
| (p $\delta\delta$ )         | 900             | 500-900          | 40000  | 24.1%                            |
| (p $\delta\epsilon$ )       | 600             | 200-600          | 40000  | 18.2%                            |
| (p $\epsilon\delta$ )       | 800             | 900-1300         | 40000  | 19.1%                            |
| (p $\epsilon\epsilon$ )     | 1300            | 800-1200         | 40000  | 46.0%                            |
| ( $\delta$ p $\delta$ )     | 700             | 300-700          | 40000  | 16.0%                            |
| ( $\delta$ p $\epsilon$ )   | 800             | 400-800          | 40000  | 13.1%                            |
| ( $\epsilon$ p $\delta$ )   | 900             | 500-900          | 40000  | 24.5%                            |
| ( $\epsilon$ p $\epsilon$ ) | 1000            | 600-1000         | 40000  | 17.6%                            |
| ( $\delta\delta$ p)         | 600             | 200-600          | 40000  | 19.2%                            |
| ( $\delta\epsilon$ p)       | 800             | 400-800          | 40000  | 36.6%                            |
| ( $\epsilon\delta$ p)       | 600             | 200-600          | 40000  | 16.4%                            |
| ( $\epsilon\epsilon$ p)     | 1300            | 900-1300         | 40000  | 18.6%                            |
| ( $\delta$ pp)              | 600             | 200-600          | 40000  | 19.8%                            |
| ( $\epsilon$ pp)            | 900             | 500-900          | 40000  | 18.7%                            |
| (p $\delta$ p)              | 600             | 200-600          | 40000  | 11.5%                            |
| (p $\epsilon$ p)            | 1700            | 1300-1700        | 40000  | 23.8%                            |
| (pp $\delta$ )              | 600             | 200-600          | 40000  | 17.5%                            |
| (pp $\epsilon$ )            | 600             | 200-600          | 40000  | 16.0%                            |
| (ppp)                       | 900             | 500-900          | 40000  | 19.3%                            |

Table S2. Probability distributions of secondary structure in each system.

| (pδδ) | Para  | Anti  | 3-10  | Alpha | Pi    | Turn  | Bend  |
|-------|-------|-------|-------|-------|-------|-------|-------|
| 1     | 0.000 | 0.000 | 0.000 | 0.000 | 0.000 | 0.000 | 0.000 |
| 2     | 0.001 | 0.016 | 0.014 | 0.003 | 0.000 | 0.021 | 0.000 |
| 3     | 0.007 | 0.024 | 0.135 | 0.035 | 0.000 | 0.127 | 0.195 |
| 4     | 0.027 | 0.027 | 0.175 | 0.156 | 0.000 | 0.135 | 0.128 |
| 5     | 0.030 | 0.061 | 0.186 | 0.170 | 0.000 | 0.131 | 0.062 |
| 6     | 0.024 | 0.068 | 0.112 | 0.169 | 0.000 | 0.175 | 0.133 |
| 7     | 0.005 | 0.052 | 0.054 | 0.151 | 0.000 | 0.168 | 0.225 |
| 8     | 0.044 | 0.038 | 0.041 | 0.074 | 0.000 | 0.178 | 0.234 |
| 9     | 0.001 | 0.088 | 0.055 | 0.104 | 0.000 | 0.209 | 0.222 |
| 10    | 0.000 | 0.192 | 0.072 | 0.152 | 0.000 | 0.198 | 0.250 |
| 11    | 0.000 | 0.275 | 0.149 | 0.202 | 0.000 | 0.186 | 0.068 |
| 12    | 0.109 | 0.279 | 0.161 | 0.245 | 0.001 | 0.121 | 0.037 |
| 13    | 0.000 | 0.146 | 0.158 | 0.247 | 0.001 | 0.321 | 0.026 |
| 14    | 0.001 | 0.021 | 0.114 | 0.235 | 0.001 | 0.511 | 0.045 |
| 15    | 0.006 | 0.031 | 0.076 | 0.173 | 0.001 | 0.500 | 0.113 |
| 16    | 0.112 | 0.340 | 0.034 | 0.066 | 0.001 | 0.193 | 0.068 |
| 17    | 0.015 | 0.654 | 0.028 | 0.054 | 0.000 | 0.055 | 0.042 |
| 18    | 0.015 | 0.500 | 0.033 | 0.056 | 0.000 | 0.062 | 0.088 |
| 19    | 0.022 | 0.617 | 0.033 | 0.051 | 0.000 | 0.039 | 0.058 |
| 20    | 0.024 | 0.490 | 0.022 | 0.054 | 0.000 | 0.042 | 0.041 |
| 21    | 0.004 | 0.291 | 0.029 | 0.117 | 0.001 | 0.051 | 0.119 |
| 22    | 0.000 | 0.179 | 0.084 | 0.175 | 0.001 | 0.213 | 0.198 |
| 23    | 0.000 | 0.011 | 0.116 | 0.176 | 0.001 | 0.290 | 0.216 |
| 24    | 0.005 | 0.009 | 0.121 | 0.174 | 0.001 | 0.370 | 0.193 |
| 25    | 0.002 | 0.046 | 0.115 | 0.141 | 0.002 | 0.280 | 0.256 |
| 26    | 0.001 | 0.027 | 0.085 | 0.067 | 0.001 | 0.366 | 0.301 |
| 27    | 0.001 | 0.034 | 0.063 | 0.058 | 0.001 | 0.327 | 0.309 |
| 28    | 0.006 | 0.027 | 0.034 | 0.064 | 0.001 | 0.275 | 0.369 |
| 29    | 0.003 | 0.094 | 0.025 | 0.061 | 0.000 | 0.102 | 0.283 |
| 30    | 0.008 | 0.346 | 0.022 | 0.066 | 0.000 | 0.056 | 0.069 |
| 31    | 0.011 | 0.533 | 0.022 | 0.082 | 0.000 | 0.079 | 0.048 |
| 32    | 0.101 | 0.524 | 0.027 | 0.131 | 0.000 | 0.072 | 0.050 |
| 33    | 0.011 | 0.403 | 0.027 | 0.125 | 0.000 | 0.177 | 0.105 |
| 34    | 0.024 | 0.490 | 0.029 | 0.121 | 0.001 | 0.189 | 0.057 |
| 35    | 0.024 | 0.331 | 0.017 | 0.117 | 0.000 | 0.348 | 0.090 |
| 36    | 0.112 | 0.135 | 0.019 | 0.043 | 0.000 | 0.406 | 0.107 |
| 37    | 0.036 | 0.151 | 0.019 | 0.016 | 0.000 | 0.285 | 0.334 |
| 38    | 0.012 | 0.202 | 0.027 | 0.009 | 0.000 | 0.243 | 0.175 |
| 39    | 0.022 | 0.467 | 0.023 | 0.008 | 0.000 | 0.127 | 0.115 |
| 40    | 0.041 | 0.506 | 0.016 | 0.008 | 0.000 | 0.086 | 0.082 |
| 41    | 0.048 | 0.391 | 0.005 | 0.002 | 0.000 | 0.020 | 0.000 |
| 42    | 0.001 | 0.068 | 0.000 | 0.000 | 0.000 | 0.000 | 0.000 |

Table S2. (Continuous Table)

| ( $p\delta\epsilon$ ) | Para  | Anti  | 3-10  | Alpha | Pi    | Turn  | Bend  |
|-----------------------|-------|-------|-------|-------|-------|-------|-------|
| 1                     | 0.000 | 0.000 | 0.000 | 0.000 | 0.000 | 0.000 | 0.000 |
| 2                     | 0.001 | 0.009 | 0.015 | 0.003 | 0.000 | 0.018 | 0.000 |
| 3                     | 0.004 | 0.031 | 0.127 | 0.035 | 0.000 | 0.118 | 0.198 |
| 4                     | 0.013 | 0.072 | 0.163 | 0.129 | 0.000 | 0.158 | 0.139 |
| 5                     | 0.041 | 0.134 | 0.163 | 0.140 | 0.000 | 0.120 | 0.068 |
| 6                     | 0.024 | 0.151 | 0.090 | 0.139 | 0.000 | 0.127 | 0.123 |
| 7                     | 0.012 | 0.169 | 0.042 | 0.115 | 0.000 | 0.140 | 0.176 |
| 8                     | 0.049 | 0.150 | 0.057 | 0.070 | 0.001 | 0.181 | 0.203 |
| 9                     | 0.001 | 0.104 | 0.087 | 0.080 | 0.001 | 0.239 | 0.198 |
| 10                    | 0.003 | 0.047 | 0.109 | 0.163 | 0.000 | 0.211 | 0.144 |
| 11                    | 0.002 | 0.039 | 0.139 | 0.232 | 0.001 | 0.230 | 0.204 |
| 12                    | 0.053 | 0.039 | 0.132 | 0.283 | 0.001 | 0.217 | 0.166 |
| 13                    | 0.000 | 0.075 | 0.116 | 0.283 | 0.001 | 0.271 | 0.089 |
| 14                    | 0.002 | 0.053 | 0.097 | 0.270 | 0.001 | 0.360 | 0.091 |
| 15                    | 0.001 | 0.154 | 0.082 | 0.208 | 0.001 | 0.278 | 0.108 |
| 16                    | 0.006 | 0.242 | 0.076 | 0.122 | 0.001 | 0.272 | 0.108 |
| 17                    | 0.035 | 0.259 | 0.070 | 0.115 | 0.000 | 0.123 | 0.083 |
| 18                    | 0.091 | 0.370 | 0.091 | 0.137 | 0.000 | 0.111 | 0.053 |
| 19                    | 0.103 | 0.351 | 0.087 | 0.124 | 0.000 | 0.088 | 0.068 |
| 20                    | 0.089 | 0.256 | 0.053 | 0.119 | 0.000 | 0.101 | 0.126 |
| 21                    | 0.005 | 0.158 | 0.034 | 0.191 | 0.001 | 0.122 | 0.158 |
| 22                    | 0.006 | 0.075 | 0.048 | 0.214 | 0.002 | 0.206 | 0.237 |
| 23                    | 0.000 | 0.032 | 0.088 | 0.255 | 0.002 | 0.304 | 0.175 |
| 24                    | 0.002 | 0.013 | 0.096 | 0.285 | 0.002 | 0.297 | 0.161 |
| 25                    | 0.002 | 0.023 | 0.120 | 0.263 | 0.003 | 0.234 | 0.159 |
| 26                    | 0.000 | 0.032 | 0.123 | 0.200 | 0.002 | 0.307 | 0.167 |
| 27                    | 0.000 | 0.036 | 0.092 | 0.144 | 0.002 | 0.373 | 0.221 |
| 28                    | 0.004 | 0.043 | 0.057 | 0.094 | 0.002 | 0.418 | 0.212 |
| 29                    | 0.002 | 0.043 | 0.034 | 0.091 | 0.002 | 0.255 | 0.207 |
| 30                    | 0.005 | 0.190 | 0.036 | 0.100 | 0.001 | 0.137 | 0.141 |
| 31                    | 0.014 | 0.293 | 0.031 | 0.116 | 0.001 | 0.123 | 0.178 |
| 32                    | 0.228 | 0.279 | 0.026 | 0.153 | 0.001 | 0.109 | 0.053 |
| 33                    | 0.007 | 0.256 | 0.031 | 0.119 | 0.001 | 0.387 | 0.107 |
| 34                    | 0.003 | 0.301 | 0.032 | 0.118 | 0.000 | 0.379 | 0.075 |
| 35                    | 0.008 | 0.389 | 0.022 | 0.112 | 0.000 | 0.351 | 0.059 |
| 36                    | 0.248 | 0.386 | 0.017 | 0.041 | 0.000 | 0.183 | 0.058 |
| 37                    | 0.020 | 0.126 | 0.010 | 0.012 | 0.000 | 0.372 | 0.196 |
| 38                    | 0.039 | 0.050 | 0.036 | 0.007 | 0.000 | 0.387 | 0.212 |
| 39                    | 0.110 | 0.159 | 0.035 | 0.006 | 0.000 | 0.301 | 0.126 |
| 40                    | 0.180 | 0.284 | 0.032 | 0.006 | 0.000 | 0.083 | 0.091 |
| 41                    | 0.110 | 0.222 | 0.005 | 0.004 | 0.000 | 0.030 | 0.000 |
| 42                    | 0.000 | 0.027 | 0.000 | 0.000 | 0.000 | 0.000 | 0.000 |

Table S2. (Continuous Table)

| ( $p\epsilon\delta$ ) | Para  | Anti  | 3-10  | Alpha | Pi    | Turn  | Bend  |
|-----------------------|-------|-------|-------|-------|-------|-------|-------|
| 1                     | 0.000 | 0.000 | 0.000 | 0.000 | 0.000 | 0.000 | 0.000 |
| 2                     | 0.015 | 0.015 | 0.018 | 0.003 | 0.000 | 0.018 | 0.000 |
| 3                     | 0.031 | 0.058 | 0.115 | 0.027 | 0.000 | 0.113 | 0.176 |
| 4                     | 0.027 | 0.104 | 0.150 | 0.103 | 0.000 | 0.136 | 0.137 |
| 5                     | 0.031 | 0.116 | 0.151 | 0.118 | 0.000 | 0.109 | 0.092 |
| 6                     | 0.027 | 0.127 | 0.092 | 0.117 | 0.001 | 0.126 | 0.119 |
| 7                     | 0.002 | 0.084 | 0.037 | 0.102 | 0.001 | 0.127 | 0.182 |
| 8                     | 0.022 | 0.092 | 0.038 | 0.075 | 0.000 | 0.155 | 0.301 |
| 9                     | 0.007 | 0.101 | 0.062 | 0.085 | 0.000 | 0.207 | 0.195 |
| 10                    | 0.002 | 0.111 | 0.076 | 0.137 | 0.000 | 0.197 | 0.260 |
| 11                    | 0.003 | 0.218 | 0.112 | 0.268 | 0.000 | 0.134 | 0.090 |
| 12                    | 0.009 | 0.157 | 0.127 | 0.338 | 0.001 | 0.214 | 0.074 |
| 13                    | 0.016 | 0.043 | 0.125 | 0.339 | 0.001 | 0.199 | 0.075 |
| 14                    | 0.000 | 0.116 | 0.081 | 0.367 | 0.001 | 0.233 | 0.143 |
| 15                    | 0.006 | 0.130 | 0.061 | 0.254 | 0.001 | 0.265 | 0.151 |
| 16                    | 0.008 | 0.181 | 0.052 | 0.140 | 0.001 | 0.293 | 0.096 |
| 17                    | 0.012 | 0.247 | 0.056 | 0.137 | 0.000 | 0.109 | 0.073 |
| 18                    | 0.009 | 0.411 | 0.073 | 0.140 | 0.001 | 0.120 | 0.039 |
| 19                    | 0.010 | 0.403 | 0.072 | 0.127 | 0.001 | 0.103 | 0.126 |
| 20                    | 0.029 | 0.434 | 0.047 | 0.123 | 0.000 | 0.112 | 0.049 |
| 21                    | 0.019 | 0.257 | 0.036 | 0.159 | 0.001 | 0.128 | 0.129 |
| 22                    | 0.003 | 0.113 | 0.052 | 0.245 | 0.001 | 0.216 | 0.219 |
| 23                    | 0.000 | 0.019 | 0.065 | 0.241 | 0.001 | 0.256 | 0.188 |
| 24                    | 0.002 | 0.008 | 0.070 | 0.235 | 0.001 | 0.294 | 0.284 |
| 25                    | 0.002 | 0.023 | 0.083 | 0.192 | 0.001 | 0.244 | 0.285 |
| 26                    | 0.003 | 0.033 | 0.089 | 0.122 | 0.001 | 0.216 | 0.299 |
| 27                    | 0.000 | 0.020 | 0.088 | 0.117 | 0.000 | 0.351 | 0.264 |
| 28                    | 0.001 | 0.025 | 0.067 | 0.109 | 0.000 | 0.385 | 0.229 |
| 29                    | 0.002 | 0.078 | 0.046 | 0.068 | 0.001 | 0.219 | 0.183 |
| 30                    | 0.010 | 0.315 | 0.036 | 0.076 | 0.000 | 0.068 | 0.099 |
| 31                    | 0.014 | 0.443 | 0.026 | 0.109 | 0.000 | 0.092 | 0.067 |
| 32                    | 0.244 | 0.383 | 0.029 | 0.189 | 0.001 | 0.059 | 0.036 |
| 33                    | 0.011 | 0.369 | 0.028 | 0.178 | 0.001 | 0.304 | 0.035 |
| 34                    | 0.018 | 0.184 | 0.040 | 0.175 | 0.001 | 0.389 | 0.118 |
| 35                    | 0.027 | 0.210 | 0.025 | 0.168 | 0.001 | 0.393 | 0.119 |
| 36                    | 0.239 | 0.186 | 0.025 | 0.070 | 0.001 | 0.327 | 0.078 |
| 37                    | 0.022 | 0.037 | 0.012 | 0.023 | 0.001 | 0.360 | 0.211 |
| 38                    | 0.006 | 0.097 | 0.023 | 0.010 | 0.001 | 0.225 | 0.384 |
| 39                    | 0.038 | 0.381 | 0.022 | 0.010 | 0.001 | 0.121 | 0.139 |
| 40                    | 0.065 | 0.397 | 0.016 | 0.009 | 0.001 | 0.072 | 0.118 |
| 41                    | 0.065 | 0.252 | 0.004 | 0.001 | 0.001 | 0.024 | 0.000 |
| 42                    | 0.001 | 0.011 | 0.000 | 0.000 | 0.000 | 0.000 | 0.000 |

Table S2. (Continuous Table)

| (pεε) | Para  | Anti  | 3-10  | Alpha | Pi    | Turn  | Bend  |
|-------|-------|-------|-------|-------|-------|-------|-------|
| 1     | 0.000 | 0.000 | 0.000 | 0.000 | 0.000 | 0.000 | 0.000 |
| 2     | 0.001 | 0.004 | 0.017 | 0.002 | 0.000 | 0.029 | 0.000 |
| 3     | 0.000 | 0.037 | 0.076 | 0.008 | 0.000 | 0.121 | 0.243 |
| 4     | 0.001 | 0.087 | 0.083 | 0.031 | 0.000 | 0.219 | 0.194 |
| 5     | 0.001 | 0.243 | 0.071 | 0.033 | 0.000 | 0.170 | 0.195 |
| 6     | 0.003 | 0.693 | 0.017 | 0.032 | 0.000 | 0.043 | 0.068 |
| 7     | 0.002 | 0.817 | 0.009 | 0.030 | 0.000 | 0.025 | 0.034 |
| 8     | 0.003 | 0.815 | 0.009 | 0.012 | 0.000 | 0.027 | 0.035 |
| 9     | 0.000 | 0.801 | 0.010 | 0.009 | 0.000 | 0.020 | 0.037 |
| 10    | 0.000 | 0.858 | 0.009 | 0.010 | 0.000 | 0.018 | 0.018 |
| 11    | 0.000 | 0.035 | 0.008 | 0.013 | 0.000 | 0.019 | 0.872 |
| 12    | 0.002 | 0.849 | 0.008 | 0.019 | 0.000 | 0.018 | 0.060 |
| 13    | 0.000 | 0.063 | 0.414 | 0.019 | 0.000 | 0.457 | 0.019 |
| 14    | 0.000 | 0.065 | 0.413 | 0.019 | 0.000 | 0.460 | 0.022 |
| 15    | 0.000 | 0.004 | 0.410 | 0.015 | 0.000 | 0.486 | 0.037 |
| 16    | 0.000 | 0.037 | 0.003 | 0.006 | 0.000 | 0.887 | 0.029 |
| 17    | 0.000 | 0.958 | 0.002 | 0.005 | 0.000 | 0.003 | 0.006 |
| 18    | 0.007 | 0.969 | 0.002 | 0.006 | 0.000 | 0.003 | 0.003 |
| 19    | 0.008 | 0.966 | 0.002 | 0.005 | 0.000 | 0.003 | 0.003 |
| 20    | 0.001 | 0.951 | 0.001 | 0.003 | 0.000 | 0.005 | 0.007 |
| 21    | 0.000 | 0.928 | 0.001 | 0.004 | 0.000 | 0.007 | 0.031 |
| 22    | 0.000 | 0.877 | 0.002 | 0.012 | 0.000 | 0.013 | 0.045 |
| 23    | 0.000 | 0.445 | 0.005 | 0.020 | 0.000 | 0.063 | 0.133 |
| 24    | 0.000 | 0.106 | 0.009 | 0.022 | 0.000 | 0.106 | 0.266 |
| 25    | 0.000 | 0.068 | 0.016 | 0.026 | 0.000 | 0.192 | 0.561 |
| 26    | 0.000 | 0.014 | 0.018 | 0.019 | 0.000 | 0.329 | 0.550 |
| 27    | 0.000 | 0.049 | 0.016 | 0.019 | 0.000 | 0.447 | 0.442 |
| 28    | 0.001 | 0.172 | 0.009 | 0.008 | 0.000 | 0.345 | 0.200 |
| 29    | 0.001 | 0.185 | 0.008 | 0.006 | 0.000 | 0.025 | 0.029 |
| 30    | 0.007 | 0.670 | 0.007 | 0.008 | 0.000 | 0.014 | 0.061 |
| 31    | 0.010 | 0.939 | 0.004 | 0.008 | 0.000 | 0.006 | 0.001 |
| 32    | 0.013 | 0.030 | 0.005 | 0.014 | 0.000 | 0.122 | 0.027 |
| 33    | 0.000 | 0.824 | 0.003 | 0.010 | 0.000 | 0.140 | 0.005 |
| 34    | 0.000 | 0.815 | 0.006 | 0.009 | 0.000 | 0.148 | 0.007 |
| 35    | 0.001 | 0.929 | 0.004 | 0.009 | 0.000 | 0.037 | 0.011 |
| 36    | 0.012 | 0.906 | 0.004 | 0.004 | 0.000 | 0.038 | 0.016 |
| 37    | 0.005 | 0.104 | 0.002 | 0.001 | 0.000 | 0.784 | 0.058 |
| 38    | 0.000 | 0.122 | 0.003 | 0.001 | 0.000 | 0.767 | 0.054 |
| 39    | 0.001 | 0.174 | 0.003 | 0.001 | 0.000 | 0.725 | 0.026 |
| 40    | 0.001 | 0.870 | 0.002 | 0.001 | 0.000 | 0.016 | 0.024 |
| 41    | 0.003 | 0.747 | 0.001 | 0.000 | 0.000 | 0.005 | 0.000 |
| 42    | 0.000 | 0.045 | 0.000 | 0.000 | 0.000 | 0.000 | 0.000 |



Table S2. (Continuous Table)

| $(\delta p \delta)$ | Para  | Anti  | 3-10  | Alpha | Pi    | Turn  | Bend  |
|---------------------|-------|-------|-------|-------|-------|-------|-------|
| 1                   | 0.000 | 0.000 | 0.000 | 0.000 | 0.000 | 0.000 | 0.000 |
| 2                   | 0.003 | 0.025 | 0.011 | 0.003 | 0.000 | 0.018 | 0.000 |
| 3                   | 0.003 | 0.057 | 0.119 | 0.042 | 0.000 | 0.076 | 0.176 |
| 4                   | 0.064 | 0.126 | 0.153 | 0.135 | 0.001 | 0.159 | 0.091 |
| 5                   | 0.011 | 0.126 | 0.152 | 0.143 | 0.001 | 0.198 | 0.059 |
| 6                   | 0.008 | 0.016 | 0.080 | 0.144 | 0.001 | 0.316 | 0.122 |
| 7                   | 0.008 | 0.082 | 0.042 | 0.113 | 0.001 | 0.281 | 0.165 |
| 8                   | 0.095 | 0.055 | 0.040 | 0.047 | 0.000 | 0.222 | 0.181 |
| 9                   | 0.007 | 0.071 | 0.048 | 0.111 | 0.000 | 0.195 | 0.240 |
| 10                  | 0.069 | 0.098 | 0.058 | 0.156 | 0.000 | 0.225 | 0.185 |
| 11                  | 0.099 | 0.083 | 0.094 | 0.206 | 0.000 | 0.205 | 0.190 |
| 12                  | 0.100 | 0.117 | 0.097 | 0.275 | 0.001 | 0.127 | 0.140 |
| 13                  | 0.030 | 0.157 | 0.103 | 0.264 | 0.001 | 0.094 | 0.080 |
| 14                  | 0.001 | 0.068 | 0.087 | 0.379 | 0.001 | 0.164 | 0.099 |
| 15                  | 0.001 | 0.033 | 0.070 | 0.344 | 0.001 | 0.150 | 0.128 |
| 16                  | 0.003 | 0.139 | 0.056 | 0.191 | 0.001 | 0.194 | 0.195 |
| 17                  | 0.004 | 0.104 | 0.058 | 0.236 | 0.000 | 0.123 | 0.128 |
| 18                  | 0.013 | 0.166 | 0.074 | 0.262 | 0.000 | 0.187 | 0.082 |
| 19                  | 0.071 | 0.233 | 0.075 | 0.263 | 0.000 | 0.112 | 0.047 |
| 20                  | 0.016 | 0.152 | 0.046 | 0.271 | 0.000 | 0.172 | 0.038 |
| 21                  | 0.004 | 0.127 | 0.038 | 0.333 | 0.002 | 0.148 | 0.170 |
| 22                  | 0.002 | 0.076 | 0.044 | 0.298 | 0.003 | 0.200 | 0.275 |
| 23                  | 0.049 | 0.017 | 0.054 | 0.419 | 0.003 | 0.220 | 0.117 |
| 24                  | 0.006 | 0.028 | 0.057 | 0.360 | 0.004 | 0.308 | 0.130 |
| 25                  | 0.000 | 0.012 | 0.070 | 0.328 | 0.005 | 0.323 | 0.155 |
| 26                  | 0.001 | 0.030 | 0.067 | 0.259 | 0.004 | 0.303 | 0.193 |
| 27                  | 0.000 | 0.059 | 0.058 | 0.226 | 0.004 | 0.333 | 0.163 |
| 28                  | 0.009 | 0.066 | 0.081 | 0.235 | 0.004 | 0.299 | 0.156 |
| 29                  | 0.007 | 0.045 | 0.085 | 0.186 | 0.003 | 0.325 | 0.170 |
| 30                  | 0.032 | 0.176 | 0.084 | 0.194 | 0.001 | 0.121 | 0.160 |
| 31                  | 0.005 | 0.372 | 0.036 | 0.201 | 0.001 | 0.146 | 0.062 |
| 32                  | 0.189 | 0.098 | 0.028 | 0.216 | 0.002 | 0.287 | 0.034 |
| 33                  | 0.004 | 0.172 | 0.025 | 0.090 | 0.002 | 0.597 | 0.070 |
| 34                  | 0.007 | 0.152 | 0.038 | 0.095 | 0.001 | 0.474 | 0.097 |
| 35                  | 0.015 | 0.380 | 0.033 | 0.090 | 0.001 | 0.300 | 0.101 |
| 36                  | 0.186 | 0.295 | 0.036 | 0.038 | 0.001 | 0.169 | 0.138 |
| 37                  | 0.023 | 0.023 | 0.020 | 0.018 | 0.001 | 0.372 | 0.347 |
| 38                  | 0.007 | 0.094 | 0.025 | 0.007 | 0.000 | 0.330 | 0.274 |
| 39                  | 0.079 | 0.291 | 0.019 | 0.006 | 0.000 | 0.224 | 0.112 |
| 40                  | 0.123 | 0.465 | 0.014 | 0.006 | 0.000 | 0.066 | 0.086 |
| 41                  | 0.129 | 0.331 | 0.003 | 0.002 | 0.000 | 0.018 | 0.000 |
| 42                  | 0.026 | 0.014 | 0.000 | 0.000 | 0.000 | 0.000 | 0.000 |

Table S2. (Continuous Table)

| ( $\delta p\epsilon$ ) | Para  | Anti  | 3-10  | Alpha | Pi    | Turn  | Bend  |
|------------------------|-------|-------|-------|-------|-------|-------|-------|
| 1                      | 0.000 | 0.000 | 0.000 | 0.000 | 0.000 | 0.000 | 0.000 |
| 2                      | 0.001 | 0.010 | 0.011 | 0.003 | 0.000 | 0.016 | 0.000 |
| 3                      | 0.002 | 0.036 | 0.128 | 0.081 | 0.001 | 0.103 | 0.182 |
| 4                      | 0.003 | 0.059 | 0.212 | 0.226 | 0.001 | 0.130 | 0.091 |
| 5                      | 0.006 | 0.048 | 0.230 | 0.232 | 0.001 | 0.171 | 0.044 |
| 6                      | 0.004 | 0.029 | 0.177 | 0.231 | 0.001 | 0.264 | 0.050 |
| 7                      | 0.001 | 0.021 | 0.083 | 0.165 | 0.001 | 0.318 | 0.157 |
| 8                      | 0.611 | 0.009 | 0.030 | 0.019 | 0.000 | 0.086 | 0.068 |
| 9                      | 0.000 | 0.007 | 0.035 | 0.014 | 0.000 | 0.709 | 0.119 |
| 10                     | 0.000 | 0.007 | 0.038 | 0.015 | 0.000 | 0.769 | 0.104 |
| 11                     | 0.001 | 0.020 | 0.028 | 0.018 | 0.000 | 0.759 | 0.093 |
| 12                     | 0.867 | 0.015 | 0.022 | 0.019 | 0.000 | 0.033 | 0.016 |
| 13                     | 0.001 | 0.016 | 0.015 | 0.017 | 0.000 | 0.906 | 0.015 |
| 14                     | 0.000 | 0.012 | 0.009 | 0.017 | 0.000 | 0.907 | 0.016 |
| 15                     | 0.001 | 0.014 | 0.005 | 0.012 | 0.000 | 0.894 | 0.028 |
| 16                     | 0.866 | 0.040 | 0.005 | 0.006 | 0.000 | 0.021 | 0.021 |
| 17                     | 0.002 | 0.038 | 0.008 | 0.010 | 0.000 | 0.016 | 0.879 |
| 18                     | 0.004 | 0.049 | 0.010 | 0.017 | 0.000 | 0.007 | 0.007 |
| 19                     | 0.861 | 0.053 | 0.012 | 0.018 | 0.000 | 0.009 | 0.014 |
| 20                     | 0.120 | 0.047 | 0.007 | 0.019 | 0.000 | 0.015 | 0.008 |
| 21                     | 0.020 | 0.015 | 0.071 | 0.477 | 0.001 | 0.213 | 0.053 |
| 22                     | 0.000 | 0.003 | 0.070 | 0.480 | 0.001 | 0.230 | 0.109 |
| 23                     | 0.001 | 0.002 | 0.076 | 0.481 | 0.001 | 0.265 | 0.105 |
| 24                     | 0.003 | 0.002 | 0.017 | 0.482 | 0.001 | 0.200 | 0.194 |
| 25                     | 0.002 | 0.002 | 0.027 | 0.040 | 0.001 | 0.143 | 0.351 |
| 26                     | 0.002 | 0.001 | 0.027 | 0.028 | 0.001 | 0.063 | 0.608 |
| 27                     | 0.000 | 0.003 | 0.160 | 0.050 | 0.001 | 0.505 | 0.178 |
| 28                     | 0.002 | 0.002 | 0.199 | 0.310 | 0.001 | 0.393 | 0.063 |
| 29                     | 0.000 | 0.007 | 0.200 | 0.641 | 0.000 | 0.092 | 0.038 |
| 30                     | 0.002 | 0.017 | 0.187 | 0.641 | 0.000 | 0.080 | 0.011 |
| 31                     | 0.003 | 0.050 | 0.024 | 0.637 | 0.000 | 0.257 | 0.007 |
| 32                     | 0.011 | 0.014 | 0.015 | 0.503 | 0.000 | 0.401 | 0.016 |
| 33                     | 0.001 | 0.041 | 0.010 | 0.025 | 0.000 | 0.874 | 0.031 |
| 34                     | 0.003 | 0.040 | 0.010 | 0.025 | 0.000 | 0.032 | 0.139 |
| 35                     | 0.860 | 0.046 | 0.004 | 0.024 | 0.000 | 0.032 | 0.021 |
| 36                     | 0.121 | 0.041 | 0.176 | 0.010 | 0.000 | 0.425 | 0.101 |
| 37                     | 0.037 | 0.020 | 0.178 | 0.011 | 0.000 | 0.452 | 0.155 |
| 38                     | 0.002 | 0.015 | 0.210 | 0.021 | 0.000 | 0.180 | 0.217 |
| 39                     | 0.006 | 0.032 | 0.181 | 0.021 | 0.000 | 0.223 | 0.145 |
| 40                     | 0.016 | 0.115 | 0.084 | 0.021 | 0.000 | 0.210 | 0.120 |
| 41                     | 0.022 | 0.081 | 0.012 | 0.012 | 0.000 | 0.090 | 0.000 |
| 42                     | 0.000 | 0.010 | 0.000 | 0.000 | 0.000 | 0.000 | 0.000 |

Table S2. (Continuous Table)

| ( $\epsilon\rho\delta$ ) | Para  | Anti  | 3-10  | Alpha | Pi    | Turn  | Bend  |
|--------------------------|-------|-------|-------|-------|-------|-------|-------|
| 1                        | 0.000 | 0.000 | 0.000 | 0.000 | 0.000 | 0.000 | 0.000 |
| 2                        | 0.002 | 0.122 | 0.007 | 0.001 | 0.000 | 0.013 | 0.000 |
| 3                        | 0.025 | 0.155 | 0.043 | 0.011 | 0.000 | 0.083 | 0.219 |
| 4                        | 0.014 | 0.214 | 0.054 | 0.075 | 0.000 | 0.106 | 0.142 |
| 5                        | 0.012 | 0.196 | 0.056 | 0.082 | 0.000 | 0.082 | 0.117 |
| 6                        | 0.006 | 0.142 | 0.071 | 0.085 | 0.000 | 0.178 | 0.166 |
| 7                        | 0.002 | 0.103 | 0.080 | 0.088 | 0.000 | 0.227 | 0.174 |
| 8                        | 0.013 | 0.028 | 0.091 | 0.095 | 0.001 | 0.215 | 0.204 |
| 9                        | 0.001 | 0.036 | 0.074 | 0.135 | 0.001 | 0.181 | 0.317 |
| 10                       | 0.004 | 0.063 | 0.073 | 0.167 | 0.001 | 0.174 | 0.323 |
| 11                       | 0.006 | 0.070 | 0.111 | 0.188 | 0.001 | 0.165 | 0.267 |
| 12                       | 0.014 | 0.096 | 0.130 | 0.200 | 0.001 | 0.227 | 0.073 |
| 13                       | 0.014 | 0.166 | 0.116 | 0.162 | 0.000 | 0.263 | 0.071 |
| 14                       | 0.016 | 0.235 | 0.054 | 0.130 | 0.000 | 0.254 | 0.086 |
| 15                       | 0.005 | 0.339 | 0.018 | 0.094 | 0.000 | 0.126 | 0.123 |
| 16                       | 0.011 | 0.435 | 0.023 | 0.029 | 0.000 | 0.114 | 0.101 |
| 17                       | 0.012 | 0.470 | 0.038 | 0.041 | 0.000 | 0.075 | 0.099 |
| 18                       | 0.034 | 0.554 | 0.059 | 0.086 | 0.000 | 0.054 | 0.050 |
| 19                       | 0.024 | 0.507 | 0.059 | 0.093 | 0.001 | 0.062 | 0.072 |
| 20                       | 0.020 | 0.331 | 0.038 | 0.095 | 0.001 | 0.077 | 0.112 |
| 21                       | 0.001 | 0.238 | 0.024 | 0.127 | 0.004 | 0.090 | 0.111 |
| 22                       | 0.001 | 0.117 | 0.051 | 0.203 | 0.008 | 0.229 | 0.174 |
| 23                       | 0.000 | 0.038 | 0.076 | 0.213 | 0.008 | 0.430 | 0.139 |
| 24                       | 0.003 | 0.014 | 0.091 | 0.219 | 0.011 | 0.436 | 0.131 |
| 25                       | 0.002 | 0.030 | 0.113 | 0.215 | 0.011 | 0.286 | 0.211 |
| 26                       | 0.000 | 0.078 | 0.111 | 0.133 | 0.009 | 0.305 | 0.164 |
| 27                       | 0.001 | 0.142 | 0.089 | 0.117 | 0.009 | 0.300 | 0.164 |
| 28                       | 0.004 | 0.175 | 0.051 | 0.104 | 0.009 | 0.272 | 0.208 |
| 29                       | 0.002 | 0.231 | 0.035 | 0.093 | 0.004 | 0.167 | 0.176 |
| 30                       | 0.002 | 0.340 | 0.035 | 0.097 | 0.000 | 0.104 | 0.130 |
| 31                       | 0.012 | 0.433 | 0.025 | 0.107 | 0.000 | 0.084 | 0.072 |
| 32                       | 0.151 | 0.377 | 0.056 | 0.176 | 0.000 | 0.083 | 0.030 |
| 33                       | 0.004 | 0.384 | 0.055 | 0.129 | 0.001 | 0.288 | 0.060 |
| 34                       | 0.001 | 0.299 | 0.069 | 0.125 | 0.000 | 0.295 | 0.101 |
| 35                       | 0.003 | 0.351 | 0.032 | 0.123 | 0.001 | 0.279 | 0.116 |
| 36                       | 0.158 | 0.300 | 0.031 | 0.031 | 0.001 | 0.279 | 0.117 |
| 37                       | 0.019 | 0.037 | 0.017 | 0.015 | 0.000 | 0.455 | 0.212 |
| 38                       | 0.006 | 0.145 | 0.018 | 0.011 | 0.000 | 0.379 | 0.217 |
| 39                       | 0.024 | 0.495 | 0.016 | 0.007 | 0.000 | 0.142 | 0.092 |
| 40                       | 0.076 | 0.592 | 0.011 | 0.007 | 0.000 | 0.051 | 0.059 |
| 41                       | 0.039 | 0.458 | 0.003 | 0.002 | 0.000 | 0.015 | 0.000 |
| 42                       | 0.001 | 0.056 | 0.000 | 0.000 | 0.000 | 0.000 | 0.000 |

Table S2. (Continuous Table)

| ( $\epsilon\mu\epsilon$ ) | Para  | Anti  | 3-10  | Alpha | Pi    | Turn  | Bend  |
|---------------------------|-------|-------|-------|-------|-------|-------|-------|
| 1                         | 0.000 | 0.000 | 0.000 | 0.000 | 0.000 | 0.000 | 0.000 |
| 2                         | 0.001 | 0.021 | 0.010 | 0.002 | 0.000 | 0.018 | 0.000 |
| 3                         | 0.002 | 0.065 | 0.056 | 0.014 | 0.000 | 0.098 | 0.216 |
| 4                         | 0.004 | 0.168 | 0.073 | 0.126 | 0.000 | 0.119 | 0.134 |
| 5                         | 0.015 | 0.194 | 0.078 | 0.135 | 0.000 | 0.094 | 0.093 |
| 6                         | 0.015 | 0.164 | 0.080 | 0.139 | 0.000 | 0.187 | 0.160 |
| 7                         | 0.001 | 0.128 | 0.098 | 0.138 | 0.000 | 0.230 | 0.186 |
| 8                         | 0.015 | 0.061 | 0.104 | 0.078 | 0.000 | 0.257 | 0.200 |
| 9                         | 0.008 | 0.026 | 0.106 | 0.104 | 0.000 | 0.239 | 0.195 |
| 10                        | 0.015 | 0.011 | 0.104 | 0.149 | 0.000 | 0.239 | 0.260 |
| 11                        | 0.014 | 0.019 | 0.173 | 0.214 | 0.001 | 0.282 | 0.150 |
| 12                        | 0.019 | 0.025 | 0.167 | 0.285 | 0.002 | 0.275 | 0.099 |
| 13                        | 0.002 | 0.024 | 0.142 | 0.271 | 0.002 | 0.246 | 0.085 |
| 14                        | 0.005 | 0.053 | 0.047 | 0.252 | 0.002 | 0.298 | 0.153 |
| 15                        | 0.013 | 0.105 | 0.030 | 0.165 | 0.001 | 0.193 | 0.229 |
| 16                        | 0.007 | 0.315 | 0.031 | 0.074 | 0.000 | 0.162 | 0.125 |
| 17                        | 0.022 | 0.425 | 0.047 | 0.070 | 0.000 | 0.085 | 0.050 |
| 18                        | 0.019 | 0.354 | 0.051 | 0.080 | 0.000 | 0.117 | 0.047 |
| 19                        | 0.037 | 0.364 | 0.049 | 0.054 | 0.000 | 0.081 | 0.085 |
| 20                        | 0.031 | 0.367 | 0.030 | 0.063 | 0.000 | 0.108 | 0.090 |
| 21                        | 0.002 | 0.201 | 0.022 | 0.199 | 0.001 | 0.114 | 0.114 |
| 22                        | 0.004 | 0.103 | 0.038 | 0.294 | 0.001 | 0.185 | 0.198 |
| 23                        | 0.000 | 0.022 | 0.044 | 0.337 | 0.001 | 0.299 | 0.152 |
| 24                        | 0.002 | 0.009 | 0.089 | 0.337 | 0.001 | 0.340 | 0.150 |
| 25                        | 0.001 | 0.009 | 0.095 | 0.292 | 0.002 | 0.294 | 0.192 |
| 26                        | 0.002 | 0.029 | 0.094 | 0.155 | 0.002 | 0.375 | 0.187 |
| 27                        | 0.000 | 0.066 | 0.059 | 0.142 | 0.002 | 0.367 | 0.167 |
| 28                        | 0.013 | 0.121 | 0.048 | 0.103 | 0.002 | 0.262 | 0.231 |
| 29                        | 0.002 | 0.143 | 0.036 | 0.075 | 0.003 | 0.133 | 0.240 |
| 30                        | 0.017 | 0.323 | 0.038 | 0.084 | 0.002 | 0.074 | 0.075 |
| 31                        | 0.024 | 0.387 | 0.046 | 0.116 | 0.002 | 0.181 | 0.066 |
| 32                        | 0.161 | 0.222 | 0.057 | 0.241 | 0.002 | 0.149 | 0.037 |
| 33                        | 0.001 | 0.222 | 0.070 | 0.239 | 0.002 | 0.303 | 0.090 |
| 34                        | 0.001 | 0.243 | 0.066 | 0.237 | 0.000 | 0.312 | 0.054 |
| 35                        | 0.011 | 0.237 | 0.039 | 0.228 | 0.001 | 0.331 | 0.053 |
| 36                        | 0.178 | 0.193 | 0.027 | 0.078 | 0.001 | 0.291 | 0.117 |
| 37                        | 0.062 | 0.044 | 0.024 | 0.026 | 0.001 | 0.347 | 0.241 |
| 38                        | 0.009 | 0.092 | 0.029 | 0.015 | 0.001 | 0.388 | 0.226 |
| 39                        | 0.028 | 0.318 | 0.029 | 0.014 | 0.001 | 0.188 | 0.150 |
| 40                        | 0.070 | 0.367 | 0.023 | 0.011 | 0.001 | 0.128 | 0.089 |
| 41                        | 0.099 | 0.264 | 0.006 | 0.003 | 0.000 | 0.029 | 0.000 |
| 42                        | 0.001 | 0.018 | 0.000 | 0.000 | 0.000 | 0.000 | 0.000 |

Table S2. (Continuous Table)

| ( $\delta\delta_p$ ) | Para  | Anti  | 3-10  | Alpha | Pi    | Turn  | Bend  |
|----------------------|-------|-------|-------|-------|-------|-------|-------|
| 1                    | 0.000 | 0.000 | 0.000 | 0.000 | 0.000 | 0.000 | 0.000 |
| 2                    | 0.003 | 0.098 | 0.010 | 0.003 | 0.000 | 0.016 | 0.000 |
| 3                    | 0.010 | 0.121 | 0.069 | 0.029 | 0.000 | 0.085 | 0.182 |
| 4                    | 0.011 | 0.115 | 0.101 | 0.123 | 0.000 | 0.119 | 0.126 |
| 5                    | 0.037 | 0.139 | 0.102 | 0.133 | 0.000 | 0.098 | 0.072 |
| 6                    | 0.024 | 0.117 | 0.076 | 0.149 | 0.002 | 0.143 | 0.114 |
| 7                    | 0.017 | 0.098 | 0.060 | 0.133 | 0.002 | 0.159 | 0.178 |
| 8                    | 0.006 | 0.070 | 0.070 | 0.115 | 0.002 | 0.204 | 0.234 |
| 9                    | 0.000 | 0.010 | 0.116 | 0.207 | 0.003 | 0.237 | 0.260 |
| 10                   | 0.000 | 0.018 | 0.137 | 0.260 | 0.003 | 0.232 | 0.155 |
| 11                   | 0.000 | 0.001 | 0.315 | 0.328 | 0.001 | 0.249 | 0.058 |
| 12                   | 0.002 | 0.000 | 0.313 | 0.380 | 0.001 | 0.250 | 0.033 |
| 13                   | 0.000 | 0.003 | 0.300 | 0.343 | 0.001 | 0.208 | 0.070 |
| 14                   | 0.001 | 0.041 | 0.126 | 0.296 | 0.000 | 0.262 | 0.079 |
| 15                   | 0.002 | 0.097 | 0.019 | 0.231 | 0.000 | 0.119 | 0.206 |
| 16                   | 0.004 | 0.222 | 0.024 | 0.087 | 0.000 | 0.188 | 0.164 |
| 17                   | 0.004 | 0.440 | 0.047 | 0.066 | 0.000 | 0.100 | 0.075 |
| 18                   | 0.008 | 0.465 | 0.083 | 0.101 | 0.000 | 0.129 | 0.079 |
| 19                   | 0.022 | 0.355 | 0.079 | 0.093 | 0.000 | 0.137 | 0.076 |
| 20                   | 0.005 | 0.350 | 0.052 | 0.094 | 0.000 | 0.084 | 0.179 |
| 21                   | 0.002 | 0.284 | 0.024 | 0.108 | 0.004 | 0.080 | 0.207 |
| 22                   | 0.003 | 0.131 | 0.039 | 0.119 | 0.004 | 0.188 | 0.273 |
| 23                   | 0.001 | 0.037 | 0.064 | 0.135 | 0.004 | 0.300 | 0.278 |
| 24                   | 0.019 | 0.029 | 0.089 | 0.207 | 0.004 | 0.354 | 0.159 |
| 25                   | 0.001 | 0.009 | 0.091 | 0.224 | 0.005 | 0.274 | 0.206 |
| 26                   | 0.001 | 0.017 | 0.092 | 0.190 | 0.001 | 0.255 | 0.244 |
| 27                   | 0.002 | 0.041 | 0.059 | 0.178 | 0.001 | 0.271 | 0.272 |
| 28                   | 0.015 | 0.105 | 0.040 | 0.102 | 0.001 | 0.272 | 0.311 |
| 29                   | 0.002 | 0.161 | 0.024 | 0.102 | 0.002 | 0.086 | 0.176 |
| 30                   | 0.007 | 0.307 | 0.023 | 0.105 | 0.001 | 0.058 | 0.193 |
| 31                   | 0.003 | 0.589 | 0.020 | 0.115 | 0.001 | 0.051 | 0.049 |
| 32                   | 0.074 | 0.370 | 0.029 | 0.164 | 0.002 | 0.185 | 0.044 |
| 33                   | 0.001 | 0.221 | 0.039 | 0.127 | 0.002 | 0.324 | 0.171 |
| 34                   | 0.003 | 0.297 | 0.042 | 0.124 | 0.001 | 0.287 | 0.112 |
| 35                   | 0.007 | 0.451 | 0.025 | 0.120 | 0.001 | 0.206 | 0.084 |
| 36                   | 0.087 | 0.363 | 0.019 | 0.035 | 0.001 | 0.221 | 0.131 |
| 37                   | 0.023 | 0.054 | 0.015 | 0.012 | 0.001 | 0.455 | 0.233 |
| 38                   | 0.007 | 0.083 | 0.026 | 0.010 | 0.000 | 0.437 | 0.217 |
| 39                   | 0.021 | 0.388 | 0.023 | 0.008 | 0.000 | 0.205 | 0.108 |
| 40                   | 0.043 | 0.513 | 0.018 | 0.008 | 0.000 | 0.073 | 0.066 |
| 41                   | 0.050 | 0.327 | 0.004 | 0.003 | 0.000 | 0.027 | 0.000 |
| 42                   | 0.005 | 0.033 | 0.000 | 0.000 | 0.000 | 0.000 | 0.000 |

Table S2. (Continuous Table)

| ( $\delta\epsilon_p$ ) | Para  | Anti  | 3-10  | Alpha | Pi    | Turn  | Bend  |
|------------------------|-------|-------|-------|-------|-------|-------|-------|
| 1                      | 0.000 | 0.000 | 0.000 | 0.000 | 0.000 | 0.000 | 0.000 |
| 2                      | 0.001 | 0.048 | 0.003 | 0.001 | 0.000 | 0.010 | 0.000 |
| 3                      | 0.004 | 0.113 | 0.021 | 0.007 | 0.000 | 0.025 | 0.345 |
| 4                      | 0.004 | 0.624 | 0.027 | 0.029 | 0.000 | 0.027 | 0.055 |
| 5                      | 0.003 | 0.816 | 0.027 | 0.031 | 0.000 | 0.024 | 0.016 |
| 6                      | 0.000 | 0.746 | 0.015 | 0.031 | 0.000 | 0.032 | 0.066 |
| 7                      | 0.000 | 0.529 | 0.011 | 0.027 | 0.000 | 0.035 | 0.073 |
| 8                      | 0.008 | 0.170 | 0.013 | 0.016 | 0.000 | 0.042 | 0.121 |
| 9                      | 0.001 | 0.008 | 0.020 | 0.018 | 0.000 | 0.063 | 0.268 |
| 10                     | 0.001 | 0.002 | 0.032 | 0.032 | 0.000 | 0.129 | 0.648 |
| 11                     | 0.000 | 0.035 | 0.050 | 0.062 | 0.000 | 0.120 | 0.477 |
| 12                     | 0.005 | 0.037 | 0.057 | 0.078 | 0.000 | 0.344 | 0.381 |
| 13                     | 0.000 | 0.039 | 0.054 | 0.078 | 0.000 | 0.583 | 0.191 |
| 14                     | 0.000 | 0.041 | 0.026 | 0.073 | 0.000 | 0.421 | 0.379 |
| 15                     | 0.009 | 0.401 | 0.005 | 0.047 | 0.000 | 0.044 | 0.075 |
| 16                     | 0.013 | 0.817 | 0.005 | 0.017 | 0.000 | 0.046 | 0.026 |
| 17                     | 0.002 | 0.848 | 0.018 | 0.020 | 0.000 | 0.020 | 0.029 |
| 18                     | 0.007 | 0.868 | 0.024 | 0.031 | 0.000 | 0.020 | 0.018 |
| 19                     | 0.005 | 0.868 | 0.025 | 0.031 | 0.000 | 0.022 | 0.019 |
| 20                     | 0.005 | 0.729 | 0.013 | 0.031 | 0.000 | 0.029 | 0.023 |
| 21                     | 0.003 | 0.217 | 0.011 | 0.040 | 0.002 | 0.059 | 0.212 |
| 22                     | 0.005 | 0.102 | 0.112 | 0.069 | 0.002 | 0.247 | 0.289 |
| 23                     | 0.000 | 0.028 | 0.137 | 0.068 | 0.001 | 0.350 | 0.202 |
| 24                     | 0.002 | 0.006 | 0.160 | 0.071 | 0.001 | 0.426 | 0.250 |
| 25                     | 0.000 | 0.003 | 0.082 | 0.067 | 0.002 | 0.358 | 0.305 |
| 26                     | 0.000 | 0.017 | 0.067 | 0.035 | 0.000 | 0.330 | 0.308 |
| 27                     | 0.001 | 0.076 | 0.044 | 0.034 | 0.000 | 0.318 | 0.350 |
| 28                     | 0.002 | 0.112 | 0.034 | 0.030 | 0.000 | 0.323 | 0.225 |
| 29                     | 0.003 | 0.103 | 0.021 | 0.035 | 0.000 | 0.134 | 0.104 |
| 30                     | 0.001 | 0.314 | 0.019 | 0.035 | 0.000 | 0.054 | 0.101 |
| 31                     | 0.016 | 0.808 | 0.005 | 0.036 | 0.000 | 0.022 | 0.046 |
| 32                     | 0.028 | 0.061 | 0.005 | 0.043 | 0.000 | 0.026 | 0.057 |
| 33                     | 0.000 | 0.810 | 0.010 | 0.025 | 0.000 | 0.080 | 0.019 |
| 34                     | 0.002 | 0.819 | 0.011 | 0.024 | 0.000 | 0.066 | 0.052 |
| 35                     | 0.008 | 0.854 | 0.010 | 0.022 | 0.000 | 0.045 | 0.032 |
| 36                     | 0.025 | 0.795 | 0.005 | 0.007 | 0.000 | 0.058 | 0.052 |
| 37                     | 0.061 | 0.051 | 0.005 | 0.003 | 0.000 | 0.662 | 0.110 |
| 38                     | 0.002 | 0.086 | 0.009 | 0.003 | 0.000 | 0.700 | 0.115 |
| 39                     | 0.006 | 0.682 | 0.007 | 0.003 | 0.000 | 0.122 | 0.058 |
| 40                     | 0.024 | 0.765 | 0.005 | 0.002 | 0.000 | 0.078 | 0.028 |
| 41                     | 0.077 | 0.581 | 0.001 | 0.001 | 0.000 | 0.006 | 0.000 |
| 42                     | 0.000 | 0.031 | 0.000 | 0.000 | 0.000 | 0.000 | 0.000 |

Table S2. (Continuous Table)

| ( $\epsilon\delta p$ ) | Para  | Anti  | 3-10  | Alpha | Pi    | Turn  | Bend  |
|------------------------|-------|-------|-------|-------|-------|-------|-------|
| 1                      | 0.000 | 0.000 | 0.000 | 0.000 | 0.000 | 0.000 | 0.000 |
| 2                      | 0.000 | 0.046 | 0.010 | 0.002 | 0.000 | 0.019 | 0.000 |
| 3                      | 0.011 | 0.076 | 0.064 | 0.019 | 0.000 | 0.096 | 0.201 |
| 4                      | 0.030 | 0.112 | 0.078 | 0.128 | 0.000 | 0.134 | 0.118 |
| 5                      | 0.005 | 0.120 | 0.080 | 0.136 | 0.000 | 0.129 | 0.091 |
| 6                      | 0.003 | 0.091 | 0.074 | 0.140 | 0.000 | 0.205 | 0.172 |
| 7                      | 0.010 | 0.063 | 0.073 | 0.137 | 0.000 | 0.197 | 0.184 |
| 8                      | 0.005 | 0.056 | 0.091 | 0.158 | 0.001 | 0.221 | 0.190 |
| 9                      | 0.001 | 0.026 | 0.094 | 0.250 | 0.001 | 0.197 | 0.190 |
| 10                     | 0.001 | 0.019 | 0.102 | 0.344 | 0.001 | 0.160 | 0.172 |
| 11                     | 0.006 | 0.056 | 0.226 | 0.424 | 0.001 | 0.194 | 0.046 |
| 12                     | 0.002 | 0.001 | 0.232 | 0.432 | 0.001 | 0.288 | 0.022 |
| 13                     | 0.000 | 0.000 | 0.224 | 0.367 | 0.001 | 0.273 | 0.080 |
| 14                     | 0.001 | 0.015 | 0.120 | 0.324 | 0.001 | 0.321 | 0.048 |
| 15                     | 0.002 | 0.097 | 0.040 | 0.247 | 0.001 | 0.198 | 0.104 |
| 16                     | 0.004 | 0.192 | 0.027 | 0.098 | 0.001 | 0.238 | 0.122 |
| 17                     | 0.007 | 0.335 | 0.043 | 0.056 | 0.000 | 0.124 | 0.124 |
| 18                     | 0.056 | 0.325 | 0.072 | 0.106 | 0.000 | 0.070 | 0.124 |
| 19                     | 0.020 | 0.370 | 0.077 | 0.123 | 0.001 | 0.106 | 0.062 |
| 20                     | 0.009 | 0.262 | 0.051 | 0.129 | 0.001 | 0.121 | 0.081 |
| 21                     | 0.001 | 0.135 | 0.024 | 0.176 | 0.001 | 0.153 | 0.126 |
| 22                     | 0.000 | 0.087 | 0.034 | 0.227 | 0.001 | 0.223 | 0.245 |
| 23                     | 0.000 | 0.071 | 0.056 | 0.213 | 0.001 | 0.262 | 0.188 |
| 24                     | 0.039 | 0.026 | 0.085 | 0.230 | 0.001 | 0.313 | 0.150 |
| 25                     | 0.003 | 0.022 | 0.102 | 0.214 | 0.002 | 0.283 | 0.186 |
| 26                     | 0.001 | 0.014 | 0.106 | 0.117 | 0.002 | 0.393 | 0.170 |
| 27                     | 0.036 | 0.045 | 0.079 | 0.111 | 0.002 | 0.373 | 0.207 |
| 28                     | 0.041 | 0.065 | 0.069 | 0.099 | 0.003 | 0.261 | 0.205 |
| 29                     | 0.002 | 0.104 | 0.058 | 0.107 | 0.003 | 0.120 | 0.209 |
| 30                     | 0.007 | 0.267 | 0.056 | 0.111 | 0.003 | 0.077 | 0.114 |
| 31                     | 0.017 | 0.396 | 0.033 | 0.121 | 0.003 | 0.102 | 0.060 |
| 32                     | 0.235 | 0.287 | 0.034 | 0.148 | 0.003 | 0.105 | 0.046 |
| 33                     | 0.032 | 0.289 | 0.041 | 0.111 | 0.002 | 0.394 | 0.063 |
| 34                     | 0.007 | 0.291 | 0.043 | 0.113 | 0.001 | 0.387 | 0.061 |
| 35                     | 0.013 | 0.245 | 0.024 | 0.109 | 0.001 | 0.395 | 0.102 |
| 36                     | 0.193 | 0.260 | 0.021 | 0.047 | 0.001 | 0.247 | 0.121 |
| 37                     | 0.055 | 0.064 | 0.021 | 0.025 | 0.001 | 0.294 | 0.296 |
| 38                     | 0.003 | 0.081 | 0.026 | 0.016 | 0.000 | 0.322 | 0.279 |
| 39                     | 0.041 | 0.268 | 0.022 | 0.016 | 0.000 | 0.184 | 0.141 |
| 40                     | 0.033 | 0.364 | 0.014 | 0.015 | 0.000 | 0.104 | 0.100 |
| 41                     | 0.061 | 0.261 | 0.003 | 0.002 | 0.000 | 0.022 | 0.000 |
| 42                     | 0.000 | 0.018 | 0.000 | 0.000 | 0.000 | 0.000 | 0.000 |

Table S2. (Continuous Table)

| ( $\epsilon p$ ) | Para  | Anti  | 3-10  | Alpha | Pi    | Turn  | Bend  |
|------------------|-------|-------|-------|-------|-------|-------|-------|
| 1                | 0.000 | 0.000 | 0.000 | 0.000 | 0.000 | 0.000 | 0.000 |
| 2                | 0.001 | 0.018 | 0.008 | 0.001 | 0.000 | 0.015 | 0.000 |
| 3                | 0.010 | 0.050 | 0.045 | 0.011 | 0.000 | 0.075 | 0.253 |
| 4                | 0.059 | 0.114 | 0.056 | 0.055 | 0.000 | 0.108 | 0.142 |
| 5                | 0.052 | 0.163 | 0.056 | 0.060 | 0.000 | 0.089 | 0.087 |
| 6                | 0.003 | 0.127 | 0.069 | 0.061 | 0.000 | 0.202 | 0.192 |
| 7                | 0.001 | 0.039 | 0.081 | 0.057 | 0.000 | 0.258 | 0.254 |
| 8                | 0.005 | 0.057 | 0.086 | 0.035 | 0.000 | 0.204 | 0.249 |
| 9                | 0.001 | 0.077 | 0.078 | 0.048 | 0.000 | 0.167 | 0.239 |
| 10               | 0.002 | 0.196 | 0.080 | 0.080 | 0.000 | 0.181 | 0.137 |
| 11               | 0.001 | 0.166 | 0.136 | 0.246 | 0.000 | 0.228 | 0.113 |
| 12               | 0.001 | 0.155 | 0.148 | 0.298 | 0.000 | 0.268 | 0.086 |
| 13               | 0.001 | 0.003 | 0.141 | 0.297 | 0.000 | 0.377 | 0.095 |
| 14               | 0.000 | 0.084 | 0.064 | 0.284 | 0.000 | 0.349 | 0.079 |
| 15               | 0.025 | 0.181 | 0.026 | 0.155 | 0.000 | 0.334 | 0.122 |
| 16               | 0.057 | 0.358 | 0.028 | 0.078 | 0.000 | 0.193 | 0.101 |
| 17               | 0.052 | 0.366 | 0.065 | 0.103 | 0.000 | 0.065 | 0.094 |
| 18               | 0.041 | 0.429 | 0.099 | 0.178 | 0.001 | 0.097 | 0.034 |
| 19               | 0.062 | 0.255 | 0.097 | 0.188 | 0.001 | 0.078 | 0.190 |
| 20               | 0.027 | 0.207 | 0.059 | 0.190 | 0.001 | 0.115 | 0.059 |
| 21               | 0.003 | 0.161 | 0.020 | 0.371 | 0.002 | 0.147 | 0.087 |
| 22               | 0.001 | 0.130 | 0.029 | 0.342 | 0.002 | 0.217 | 0.133 |
| 23               | 0.002 | 0.071 | 0.051 | 0.338 | 0.002 | 0.242 | 0.150 |
| 24               | 0.045 | 0.007 | 0.083 | 0.325 | 0.002 | 0.347 | 0.123 |
| 25               | 0.001 | 0.018 | 0.094 | 0.225 | 0.003 | 0.433 | 0.129 |
| 26               | 0.002 | 0.022 | 0.091 | 0.088 | 0.001 | 0.492 | 0.167 |
| 27               | 0.000 | 0.083 | 0.054 | 0.077 | 0.001 | 0.364 | 0.237 |
| 28               | 0.050 | 0.118 | 0.068 | 0.136 | 0.001 | 0.180 | 0.154 |
| 29               | 0.005 | 0.132 | 0.067 | 0.210 | 0.001 | 0.132 | 0.172 |
| 30               | 0.003 | 0.203 | 0.073 | 0.216 | 0.001 | 0.102 | 0.104 |
| 31               | 0.008 | 0.313 | 0.049 | 0.239 | 0.001 | 0.174 | 0.056 |
| 32               | 0.134 | 0.174 | 0.039 | 0.269 | 0.001 | 0.204 | 0.047 |
| 33               | 0.015 | 0.199 | 0.041 | 0.123 | 0.001 | 0.463 | 0.080 |
| 34               | 0.004 | 0.240 | 0.074 | 0.128 | 0.000 | 0.327 | 0.093 |
| 35               | 0.037 | 0.355 | 0.065 | 0.120 | 0.001 | 0.281 | 0.061 |
| 36               | 0.154 | 0.312 | 0.059 | 0.050 | 0.001 | 0.224 | 0.098 |
| 37               | 0.033 | 0.038 | 0.021 | 0.022 | 0.001 | 0.405 | 0.241 |
| 38               | 0.007 | 0.126 | 0.021 | 0.008 | 0.000 | 0.403 | 0.211 |
| 39               | 0.014 | 0.308 | 0.021 | 0.008 | 0.000 | 0.319 | 0.105 |
| 40               | 0.054 | 0.477 | 0.017 | 0.007 | 0.000 | 0.076 | 0.088 |
| 41               | 0.062 | 0.234 | 0.004 | 0.003 | 0.000 | 0.027 | 0.000 |
| 42               | 0.001 | 0.043 | 0.000 | 0.000 | 0.000 | 0.000 | 0.000 |



Table S2. (Continuous Table)

| ( $\delta_{pp}$ ) | Para  | Anti  | 3-10  | Alpha | Pi    | Turn  | Bend  |
|-------------------|-------|-------|-------|-------|-------|-------|-------|
| 1                 | 0.000 | 0.000 | 0.000 | 0.000 | 0.000 | 0.000 | 0.000 |
| 2                 | 0.005 | 0.009 | 0.014 | 0.004 | 0.000 | 0.019 | 0.000 |
| 3                 | 0.017 | 0.014 | 0.129 | 0.049 | 0.001 | 0.114 | 0.183 |
| 4                 | 0.019 | 0.065 | 0.177 | 0.166 | 0.001 | 0.161 | 0.105 |
| 5                 | 0.024 | 0.058 | 0.179 | 0.177 | 0.001 | 0.146 | 0.067 |
| 6                 | 0.011 | 0.049 | 0.122 | 0.177 | 0.001 | 0.196 | 0.129 |
| 7                 | 0.003 | 0.048 | 0.083 | 0.146 | 0.001 | 0.213 | 0.179 |
| 8                 | 0.006 | 0.052 | 0.072 | 0.089 | 0.001 | 0.235 | 0.236 |
| 9                 | 0.002 | 0.052 | 0.086 | 0.102 | 0.000 | 0.234 | 0.269 |
| 10                | 0.003 | 0.132 | 0.089 | 0.135 | 0.000 | 0.199 | 0.145 |
| 11                | 0.041 | 0.185 | 0.187 | 0.166 | 0.000 | 0.130 | 0.118 |
| 12                | 0.040 | 0.191 | 0.207 | 0.169 | 0.001 | 0.184 | 0.128 |
| 13                | 0.025 | 0.021 | 0.193 | 0.155 | 0.001 | 0.393 | 0.072 |
| 14                | 0.001 | 0.041 | 0.117 | 0.142 | 0.001 | 0.451 | 0.101 |
| 15                | 0.035 | 0.163 | 0.051 | 0.083 | 0.001 | 0.251 | 0.219 |
| 16                | 0.035 | 0.362 | 0.055 | 0.022 | 0.001 | 0.089 | 0.126 |
| 17                | 0.076 | 0.424 | 0.041 | 0.052 | 0.000 | 0.053 | 0.071 |
| 18                | 0.066 | 0.412 | 0.076 | 0.129 | 0.000 | 0.088 | 0.061 |
| 19                | 0.069 | 0.437 | 0.079 | 0.140 | 0.001 | 0.114 | 0.047 |
| 20                | 0.045 | 0.378 | 0.050 | 0.151 | 0.001 | 0.131 | 0.030 |
| 21                | 0.000 | 0.197 | 0.051 | 0.295 | 0.002 | 0.176 | 0.083 |
| 22                | 0.016 | 0.143 | 0.061 | 0.304 | 0.002 | 0.229 | 0.146 |
| 23                | 0.016 | 0.057 | 0.077 | 0.304 | 0.002 | 0.280 | 0.096 |
| 24                | 0.006 | 0.050 | 0.065 | 0.276 | 0.002 | 0.320 | 0.181 |
| 25                | 0.001 | 0.035 | 0.073 | 0.196 | 0.002 | 0.286 | 0.227 |
| 26                | 0.009 | 0.047 | 0.082 | 0.112 | 0.001 | 0.314 | 0.236 |
| 27                | 0.000 | 0.056 | 0.065 | 0.092 | 0.000 | 0.438 | 0.193 |
| 28                | 0.006 | 0.032 | 0.053 | 0.098 | 0.001 | 0.352 | 0.231 |
| 29                | 0.002 | 0.045 | 0.043 | 0.090 | 0.001 | 0.194 | 0.233 |
| 30                | 0.063 | 0.205 | 0.045 | 0.087 | 0.000 | 0.122 | 0.122 |
| 31                | 0.013 | 0.280 | 0.043 | 0.100 | 0.000 | 0.135 | 0.060 |
| 32                | 0.200 | 0.180 | 0.054 | 0.209 | 0.001 | 0.145 | 0.093 |
| 33                | 0.012 | 0.121 | 0.055 | 0.162 | 0.001 | 0.403 | 0.131 |
| 34                | 0.012 | 0.141 | 0.057 | 0.166 | 0.001 | 0.386 | 0.095 |
| 35                | 0.010 | 0.300 | 0.032 | 0.161 | 0.001 | 0.285 | 0.082 |
| 36                | 0.240 | 0.225 | 0.028 | 0.027 | 0.001 | 0.240 | 0.082 |
| 37                | 0.007 | 0.124 | 0.016 | 0.019 | 0.000 | 0.351 | 0.215 |
| 38                | 0.026 | 0.129 | 0.041 | 0.020 | 0.000 | 0.292 | 0.314 |
| 39                | 0.060 | 0.426 | 0.040 | 0.019 | 0.000 | 0.148 | 0.092 |
| 40                | 0.151 | 0.454 | 0.035 | 0.019 | 0.000 | 0.054 | 0.064 |
| 41                | 0.124 | 0.376 | 0.006 | 0.014 | 0.000 | 0.038 | 0.000 |
| 42                | 0.017 | 0.048 | 0.000 | 0.000 | 0.000 | 0.000 | 0.000 |

Table S2. (Continuous Table)

| ( $\epsilon_{pp}$ ) | Para  | Anti  | 3-10  | Alpha | Pi    | Turn  | Bend  |
|---------------------|-------|-------|-------|-------|-------|-------|-------|
| 1                   | 0.000 | 0.000 | 0.000 | 0.000 | 0.000 | 0.000 | 0.000 |
| 2                   | 0.004 | 0.010 | 0.010 | 0.001 | 0.000 | 0.018 | 0.000 |
| 3                   | 0.011 | 0.026 | 0.053 | 0.011 | 0.000 | 0.095 | 0.242 |
| 4                   | 0.006 | 0.126 | 0.071 | 0.095 | 0.000 | 0.125 | 0.134 |
| 5                   | 0.009 | 0.125 | 0.076 | 0.107 | 0.000 | 0.105 | 0.107 |
| 6                   | 0.009 | 0.017 | 0.082 | 0.109 | 0.000 | 0.304 | 0.195 |
| 7                   | 0.003 | 0.007 | 0.082 | 0.106 | 0.000 | 0.350 | 0.184 |
| 8                   | 0.028 | 0.007 | 0.094 | 0.070 | 0.000 | 0.315 | 0.210 |
| 9                   | 0.000 | 0.107 | 0.096 | 0.085 | 0.000 | 0.215 | 0.221 |
| 10                  | 0.001 | 0.126 | 0.114 | 0.100 | 0.000 | 0.262 | 0.208 |
| 11                  | 0.001 | 0.060 | 0.193 | 0.126 | 0.000 | 0.305 | 0.149 |
| 12                  | 0.287 | 0.052 | 0.191 | 0.129 | 0.000 | 0.194 | 0.063 |
| 13                  | 0.001 | 0.016 | 0.165 | 0.105 | 0.000 | 0.506 | 0.073 |
| 14                  | 0.012 | 0.060 | 0.062 | 0.092 | 0.000 | 0.497 | 0.077 |
| 15                  | 0.033 | 0.063 | 0.007 | 0.055 | 0.000 | 0.364 | 0.175 |
| 16                  | 0.344 | 0.168 | 0.021 | 0.020 | 0.000 | 0.086 | 0.117 |
| 17                  | 0.013 | 0.150 | 0.076 | 0.065 | 0.000 | 0.075 | 0.341 |
| 18                  | 0.029 | 0.375 | 0.100 | 0.128 | 0.000 | 0.098 | 0.071 |
| 19                  | 0.014 | 0.357 | 0.099 | 0.148 | 0.000 | 0.137 | 0.097 |
| 20                  | 0.034 | 0.304 | 0.045 | 0.155 | 0.000 | 0.106 | 0.082 |
| 21                  | 0.007 | 0.272 | 0.023 | 0.178 | 0.004 | 0.111 | 0.085 |
| 22                  | 0.003 | 0.246 | 0.039 | 0.229 | 0.004 | 0.184 | 0.165 |
| 23                  | 0.001 | 0.103 | 0.064 | 0.234 | 0.004 | 0.222 | 0.175 |
| 24                  | 0.017 | 0.024 | 0.103 | 0.221 | 0.005 | 0.284 | 0.156 |
| 25                  | 0.003 | 0.066 | 0.107 | 0.228 | 0.006 | 0.229 | 0.235 |
| 26                  | 0.002 | 0.022 | 0.104 | 0.153 | 0.003 | 0.329 | 0.234 |
| 27                  | 0.002 | 0.013 | 0.066 | 0.145 | 0.003 | 0.455 | 0.209 |
| 28                  | 0.015 | 0.063 | 0.041 | 0.112 | 0.003 | 0.348 | 0.257 |
| 29                  | 0.002 | 0.100 | 0.030 | 0.098 | 0.003 | 0.139 | 0.185 |
| 30                  | 0.006 | 0.309 | 0.034 | 0.136 | 0.001 | 0.082 | 0.112 |
| 31                  | 0.009 | 0.408 | 0.031 | 0.166 | 0.001 | 0.103 | 0.044 |
| 32                  | 0.093 | 0.150 | 0.041 | 0.261 | 0.002 | 0.127 | 0.049 |
| 33                  | 0.001 | 0.291 | 0.047 | 0.221 | 0.001 | 0.269 | 0.081 |
| 34                  | 0.003 | 0.281 | 0.055 | 0.217 | 0.001 | 0.305 | 0.049 |
| 35                  | 0.023 | 0.337 | 0.031 | 0.213 | 0.001 | 0.261 | 0.066 |
| 36                  | 0.157 | 0.226 | 0.025 | 0.115 | 0.001 | 0.256 | 0.095 |
| 37                  | 0.023 | 0.077 | 0.015 | 0.028 | 0.001 | 0.476 | 0.207 |
| 38                  | 0.003 | 0.110 | 0.023 | 0.006 | 0.001 | 0.456 | 0.221 |
| 39                  | 0.029 | 0.353 | 0.017 | 0.005 | 0.000 | 0.188 | 0.172 |
| 40                  | 0.082 | 0.441 | 0.013 | 0.004 | 0.000 | 0.064 | 0.132 |
| 41                  | 0.082 | 0.384 | 0.003 | 0.002 | 0.000 | 0.018 | 0.000 |
| 42                  | 0.001 | 0.047 | 0.000 | 0.000 | 0.000 | 0.000 | 0.000 |

Table S2. (Continuous Table)

| (p $\delta$ p) | Para  | Anti  | 3-10  | Alpha | Pi    | Turn  | Bend  |
|----------------|-------|-------|-------|-------|-------|-------|-------|
| 1              | 0.000 | 0.000 | 0.000 | 0.000 | 0.000 | 0.000 | 0.000 |
| 2              | 0.002 | 0.006 | 0.021 | 0.005 | 0.000 | 0.026 | 0.000 |
| 3              | 0.005 | 0.013 | 0.156 | 0.039 | 0.000 | 0.155 | 0.199 |
| 4              | 0.011 | 0.032 | 0.200 | 0.178 | 0.000 | 0.166 | 0.111 |
| 5              | 0.017 | 0.024 | 0.201 | 0.205 | 0.001 | 0.131 | 0.086 |
| 6              | 0.016 | 0.062 | 0.120 | 0.205 | 0.001 | 0.159 | 0.128 |
| 7              | 0.006 | 0.045 | 0.054 | 0.185 | 0.001 | 0.164 | 0.170 |
| 8              | 0.006 | 0.012 | 0.041 | 0.110 | 0.001 | 0.217 | 0.225 |
| 9              | 0.002 | 0.007 | 0.084 | 0.136 | 0.001 | 0.247 | 0.247 |
| 10             | 0.006 | 0.006 | 0.125 | 0.272 | 0.001 | 0.206 | 0.154 |
| 11             | 0.005 | 0.005 | 0.256 | 0.355 | 0.001 | 0.194 | 0.090 |
| 12             | 0.002 | 0.004 | 0.262 | 0.487 | 0.001 | 0.170 | 0.026 |
| 13             | 0.001 | 0.017 | 0.238 | 0.471 | 0.001 | 0.165 | 0.039 |
| 14             | 0.000 | 0.024 | 0.124 | 0.371 | 0.001 | 0.324 | 0.048 |
| 15             | 0.000 | 0.052 | 0.030 | 0.286 | 0.001 | 0.277 | 0.147 |
| 16             | 0.004 | 0.071 | 0.040 | 0.116 | 0.001 | 0.310 | 0.168 |
| 17             | 0.019 | 0.216 | 0.082 | 0.095 | 0.001 | 0.106 | 0.137 |
| 18             | 0.048 | 0.278 | 0.119 | 0.142 | 0.001 | 0.110 | 0.085 |
| 19             | 0.058 | 0.259 | 0.117 | 0.132 | 0.001 | 0.116 | 0.069 |
| 20             | 0.011 | 0.199 | 0.065 | 0.134 | 0.001 | 0.135 | 0.180 |
| 21             | 0.004 | 0.113 | 0.035 | 0.166 | 0.004 | 0.147 | 0.172 |
| 22             | 0.003 | 0.061 | 0.052 | 0.210 | 0.004 | 0.228 | 0.238 |
| 23             | 0.002 | 0.046 | 0.076 | 0.241 | 0.004 | 0.306 | 0.175 |
| 24             | 0.014 | 0.034 | 0.099 | 0.244 | 0.005 | 0.345 | 0.154 |
| 25             | 0.001 | 0.024 | 0.115 | 0.254 | 0.006 | 0.242 | 0.184 |
| 26             | 0.001 | 0.022 | 0.114 | 0.203 | 0.003 | 0.284 | 0.203 |
| 27             | 0.001 | 0.026 | 0.092 | 0.187 | 0.003 | 0.314 | 0.207 |
| 28             | 0.014 | 0.034 | 0.064 | 0.170 | 0.003 | 0.324 | 0.233 |
| 29             | 0.006 | 0.059 | 0.051 | 0.197 | 0.003 | 0.177 | 0.230 |
| 30             | 0.045 | 0.121 | 0.050 | 0.196 | 0.001 | 0.115 | 0.129 |
| 31             | 0.051 | 0.212 | 0.044 | 0.214 | 0.001 | 0.126 | 0.071 |
| 32             | 0.153 | 0.108 | 0.043 | 0.275 | 0.001 | 0.152 | 0.063 |
| 33             | 0.003 | 0.111 | 0.048 | 0.167 | 0.001 | 0.414 | 0.138 |
| 34             | 0.013 | 0.139 | 0.050 | 0.162 | 0.001 | 0.339 | 0.151 |
| 35             | 0.010 | 0.198 | 0.034 | 0.150 | 0.001 | 0.353 | 0.139 |
| 36             | 0.212 | 0.167 | 0.033 | 0.055 | 0.001 | 0.253 | 0.119 |
| 37             | 0.048 | 0.021 | 0.028 | 0.023 | 0.000 | 0.348 | 0.251 |
| 38             | 0.008 | 0.097 | 0.037 | 0.015 | 0.000 | 0.382 | 0.236 |
| 39             | 0.013 | 0.286 | 0.029 | 0.012 | 0.000 | 0.263 | 0.123 |
| 40             | 0.068 | 0.376 | 0.023 | 0.009 | 0.000 | 0.122 | 0.105 |
| 41             | 0.078 | 0.244 | 0.005 | 0.003 | 0.000 | 0.032 | 0.000 |
| 42             | 0.001 | 0.023 | 0.000 | 0.000 | 0.000 | 0.000 | 0.000 |

Table S2. (Continuous Table)

| (pep) | Para  | Anti  | 3-10  | Alpha | Pi    | Turn  | Bend  |
|-------|-------|-------|-------|-------|-------|-------|-------|
| 1     | 0.000 | 0.000 | 0.000 | 0.000 | 0.000 | 0.000 | 0.000 |
| 2     | 0.003 | 0.011 | 0.018 | 0.004 | 0.000 | 0.022 | 0.000 |
| 3     | 0.005 | 0.029 | 0.137 | 0.062 | 0.000 | 0.110 | 0.193 |
| 4     | 0.002 | 0.073 | 0.175 | 0.152 | 0.000 | 0.170 | 0.131 |
| 5     | 0.007 | 0.125 | 0.176 | 0.159 | 0.000 | 0.139 | 0.077 |
| 6     | 0.014 | 0.119 | 0.093 | 0.157 | 0.000 | 0.179 | 0.145 |
| 7     | 0.001 | 0.094 | 0.042 | 0.114 | 0.000 | 0.188 | 0.210 |
| 8     | 0.019 | 0.026 | 0.040 | 0.058 | 0.000 | 0.196 | 0.216 |
| 9     | 0.007 | 0.012 | 0.074 | 0.072 | 0.000 | 0.209 | 0.267 |
| 10    | 0.000 | 0.014 | 0.098 | 0.103 | 0.000 | 0.241 | 0.205 |
| 11    | 0.004 | 0.001 | 0.171 | 0.270 | 0.000 | 0.261 | 0.135 |
| 12    | 0.017 | 0.003 | 0.222 | 0.313 | 0.001 | 0.333 | 0.065 |
| 13    | 0.004 | 0.013 | 0.218 | 0.311 | 0.001 | 0.331 | 0.035 |
| 14    | 0.000 | 0.014 | 0.121 | 0.296 | 0.001 | 0.409 | 0.059 |
| 15    | 0.000 | 0.140 | 0.031 | 0.189 | 0.000 | 0.217 | 0.174 |
| 16    | 0.006 | 0.224 | 0.022 | 0.103 | 0.000 | 0.195 | 0.199 |
| 17    | 0.008 | 0.340 | 0.033 | 0.058 | 0.000 | 0.173 | 0.138 |
| 18    | 0.005 | 0.541 | 0.036 | 0.024 | 0.000 | 0.173 | 0.062 |
| 19    | 0.007 | 0.746 | 0.036 | 0.022 | 0.000 | 0.051 | 0.060 |
| 20    | 0.004 | 0.726 | 0.014 | 0.023 | 0.000 | 0.062 | 0.045 |
| 21    | 0.003 | 0.513 | 0.064 | 0.122 | 0.000 | 0.104 | 0.041 |
| 22    | 0.002 | 0.461 | 0.069 | 0.120 | 0.000 | 0.116 | 0.160 |
| 23    | 0.000 | 0.510 | 0.074 | 0.128 | 0.000 | 0.113 | 0.080 |
| 24    | 0.001 | 0.010 | 0.064 | 0.148 | 0.000 | 0.236 | 0.066 |
| 25    | 0.000 | 0.007 | 0.048 | 0.049 | 0.001 | 0.353 | 0.083 |
| 26    | 0.000 | 0.003 | 0.048 | 0.045 | 0.000 | 0.540 | 0.107 |
| 27    | 0.000 | 0.001 | 0.022 | 0.042 | 0.000 | 0.589 | 0.278 |
| 28    | 0.001 | 0.094 | 0.013 | 0.049 | 0.000 | 0.366 | 0.182 |
| 29    | 0.000 | 0.122 | 0.009 | 0.064 | 0.000 | 0.029 | 0.120 |
| 30    | 0.003 | 0.160 | 0.015 | 0.067 | 0.000 | 0.039 | 0.599 |
| 31    | 0.026 | 0.802 | 0.013 | 0.067 | 0.000 | 0.021 | 0.013 |
| 32    | 0.021 | 0.019 | 0.012 | 0.071 | 0.000 | 0.694 | 0.016 |
| 33    | 0.001 | 0.084 | 0.008 | 0.035 | 0.000 | 0.735 | 0.031 |
| 34    | 0.003 | 0.068 | 0.007 | 0.033 | 0.000 | 0.711 | 0.023 |
| 35    | 0.005 | 0.762 | 0.006 | 0.034 | 0.000 | 0.042 | 0.021 |
| 36    | 0.112 | 0.711 | 0.006 | 0.018 | 0.000 | 0.038 | 0.031 |
| 37    | 0.005 | 0.544 | 0.006 | 0.007 | 0.000 | 0.177 | 0.097 |
| 38    | 0.004 | 0.350 | 0.043 | 0.012 | 0.000 | 0.258 | 0.165 |
| 39    | 0.010 | 0.418 | 0.043 | 0.010 | 0.000 | 0.238 | 0.100 |
| 40    | 0.092 | 0.378 | 0.041 | 0.010 | 0.000 | 0.083 | 0.089 |
| 41    | 0.012 | 0.347 | 0.004 | 0.008 | 0.000 | 0.034 | 0.000 |
| 42    | 0.001 | 0.026 | 0.000 | 0.000 | 0.000 | 0.000 | 0.000 |

Table S2. (Continuous Table)

| (ppδ) | Para  | Anti  | 3-10  | Alpha | Pi    | Turn  | Bend  |
|-------|-------|-------|-------|-------|-------|-------|-------|
| 1     | 0.000 | 0.000 | 0.000 | 0.000 | 0.000 | 0.000 | 0.000 |
| 2     | 0.001 | 0.006 | 0.017 | 0.005 | 0.000 | 0.025 | 0.000 |
| 3     | 0.002 | 0.015 | 0.153 | 0.048 | 0.000 | 0.145 | 0.186 |
| 4     | 0.012 | 0.055 | 0.197 | 0.158 | 0.000 | 0.178 | 0.123 |
| 5     | 0.012 | 0.105 | 0.196 | 0.172 | 0.000 | 0.140 | 0.078 |
| 6     | 0.014 | 0.066 | 0.105 | 0.171 | 0.000 | 0.164 | 0.160 |
| 7     | 0.004 | 0.051 | 0.049 | 0.144 | 0.000 | 0.165 | 0.186 |
| 8     | 0.049 | 0.025 | 0.054 | 0.115 | 0.001 | 0.223 | 0.188 |
| 9     | 0.001 | 0.007 | 0.081 | 0.166 | 0.001 | 0.304 | 0.197 |
| 10    | 0.000 | 0.013 | 0.128 | 0.217 | 0.001 | 0.319 | 0.183 |
| 11    | 0.001 | 0.017 | 0.216 | 0.291 | 0.001 | 0.248 | 0.087 |
| 12    | 0.045 | 0.042 | 0.221 | 0.294 | 0.001 | 0.213 | 0.070 |
| 13    | 0.001 | 0.075 | 0.189 | 0.261 | 0.001 | 0.213 | 0.085 |
| 14    | 0.004 | 0.159 | 0.075 | 0.232 | 0.001 | 0.242 | 0.064 |
| 15    | 0.004 | 0.265 | 0.032 | 0.130 | 0.001 | 0.146 | 0.198 |
| 16    | 0.014 | 0.311 | 0.033 | 0.030 | 0.001 | 0.151 | 0.161 |
| 17    | 0.051 | 0.342 | 0.035 | 0.040 | 0.000 | 0.055 | 0.111 |
| 18    | 0.024 | 0.398 | 0.067 | 0.094 | 0.000 | 0.080 | 0.087 |
| 19    | 0.017 | 0.388 | 0.069 | 0.096 | 0.000 | 0.080 | 0.067 |
| 20    | 0.004 | 0.289 | 0.056 | 0.108 | 0.000 | 0.102 | 0.102 |
| 21    | 0.001 | 0.230 | 0.031 | 0.149 | 0.001 | 0.118 | 0.118 |
| 22    | 0.004 | 0.060 | 0.048 | 0.172 | 0.001 | 0.249 | 0.257 |
| 23    | 0.004 | 0.040 | 0.074 | 0.176 | 0.001 | 0.283 | 0.214 |
| 24    | 0.007 | 0.019 | 0.099 | 0.180 | 0.001 | 0.329 | 0.234 |
| 25    | 0.001 | 0.027 | 0.121 | 0.156 | 0.001 | 0.262 | 0.262 |
| 26    | 0.001 | 0.022 | 0.118 | 0.093 | 0.001 | 0.301 | 0.276 |
| 27    | 0.002 | 0.029 | 0.090 | 0.078 | 0.001 | 0.355 | 0.274 |
| 28    | 0.013 | 0.029 | 0.056 | 0.092 | 0.001 | 0.349 | 0.269 |
| 29    | 0.001 | 0.051 | 0.044 | 0.141 | 0.000 | 0.141 | 0.251 |
| 30    | 0.006 | 0.175 | 0.045 | 0.149 | 0.000 | 0.092 | 0.126 |
| 31    | 0.017 | 0.340 | 0.035 | 0.160 | 0.000 | 0.081 | 0.057 |
| 32    | 0.234 | 0.153 | 0.043 | 0.203 | 0.000 | 0.080 | 0.041 |
| 33    | 0.005 | 0.296 | 0.042 | 0.163 | 0.001 | 0.337 | 0.077 |
| 34    | 0.014 | 0.269 | 0.048 | 0.159 | 0.001 | 0.364 | 0.048 |
| 35    | 0.021 | 0.273 | 0.023 | 0.151 | 0.001 | 0.377 | 0.069 |
| 36    | 0.214 | 0.300 | 0.021 | 0.034 | 0.001 | 0.219 | 0.094 |
| 37    | 0.047 | 0.117 | 0.024 | 0.021 | 0.001 | 0.306 | 0.241 |
| 38    | 0.010 | 0.147 | 0.037 | 0.021 | 0.000 | 0.268 | 0.231 |
| 39    | 0.032 | 0.358 | 0.038 | 0.020 | 0.000 | 0.215 | 0.083 |
| 40    | 0.080 | 0.391 | 0.024 | 0.019 | 0.000 | 0.115 | 0.095 |
| 41    | 0.059 | 0.356 | 0.007 | 0.004 | 0.000 | 0.032 | 0.000 |
| 42    | 0.001 | 0.027 | 0.000 | 0.000 | 0.000 | 0.000 | 0.000 |

Table S2. (Continuous Table)

| (ppe) | Para  | Anti  | 3-10  | Alpha | Pi    | Turn  | Bend  |
|-------|-------|-------|-------|-------|-------|-------|-------|
| 1     | 0.000 | 0.000 | 0.000 | 0.000 | 0.000 | 0.000 | 0.000 |
| 2     | 0.002 | 0.004 | 0.018 | 0.004 | 0.000 | 0.024 | 0.000 |
| 3     | 0.005 | 0.043 | 0.122 | 0.033 | 0.000 | 0.134 | 0.182 |
| 4     | 0.014 | 0.070 | 0.163 | 0.142 | 0.000 | 0.153 | 0.124 |
| 5     | 0.016 | 0.096 | 0.163 | 0.161 | 0.001 | 0.131 | 0.078 |
| 6     | 0.010 | 0.070 | 0.106 | 0.160 | 0.001 | 0.164 | 0.117 |
| 7     | 0.003 | 0.065 | 0.043 | 0.142 | 0.001 | 0.159 | 0.172 |
| 8     | 0.061 | 0.023 | 0.054 | 0.084 | 0.001 | 0.178 | 0.245 |
| 9     | 0.002 | 0.024 | 0.081 | 0.085 | 0.001 | 0.252 | 0.279 |
| 10    | 0.002 | 0.060 | 0.124 | 0.110 | 0.000 | 0.245 | 0.222 |
| 11    | 0.002 | 0.093 | 0.188 | 0.152 | 0.001 | 0.242 | 0.123 |
| 12    | 0.061 | 0.066 | 0.169 | 0.132 | 0.001 | 0.248 | 0.121 |
| 13    | 0.014 | 0.051 | 0.142 | 0.117 | 0.001 | 0.167 | 0.143 |
| 14    | 0.005 | 0.098 | 0.034 | 0.106 | 0.001 | 0.189 | 0.165 |
| 15    | 0.000 | 0.136 | 0.038 | 0.068 | 0.001 | 0.238 | 0.278 |
| 16    | 0.022 | 0.168 | 0.043 | 0.045 | 0.000 | 0.199 | 0.217 |
| 17    | 0.057 | 0.174 | 0.072 | 0.088 | 0.000 | 0.159 | 0.111 |
| 18    | 0.060 | 0.220 | 0.080 | 0.137 | 0.000 | 0.152 | 0.121 |
| 19    | 0.041 | 0.145 | 0.080 | 0.130 | 0.001 | 0.180 | 0.115 |
| 20    | 0.038 | 0.280 | 0.052 | 0.146 | 0.001 | 0.131 | 0.101 |
| 21    | 0.005 | 0.184 | 0.027 | 0.228 | 0.002 | 0.201 | 0.136 |
| 22    | 0.002 | 0.147 | 0.049 | 0.228 | 0.002 | 0.242 | 0.197 |
| 23    | 0.000 | 0.102 | 0.105 | 0.233 | 0.002 | 0.289 | 0.098 |
| 24    | 0.002 | 0.110 | 0.137 | 0.210 | 0.002 | 0.272 | 0.110 |
| 25    | 0.013 | 0.065 | 0.152 | 0.166 | 0.002 | 0.249 | 0.174 |
| 26    | 0.020 | 0.015 | 0.123 | 0.088 | 0.001 | 0.309 | 0.223 |
| 27    | 0.003 | 0.015 | 0.096 | 0.073 | 0.001 | 0.384 | 0.272 |
| 28    | 0.004 | 0.027 | 0.052 | 0.054 | 0.001 | 0.311 | 0.345 |
| 29    | 0.005 | 0.041 | 0.047 | 0.054 | 0.001 | 0.131 | 0.315 |
| 30    | 0.072 | 0.156 | 0.032 | 0.057 | 0.000 | 0.092 | 0.148 |
| 31    | 0.087 | 0.368 | 0.029 | 0.073 | 0.000 | 0.098 | 0.074 |
| 32    | 0.236 | 0.242 | 0.033 | 0.166 | 0.001 | 0.183 | 0.035 |
| 33    | 0.002 | 0.219 | 0.050 | 0.167 | 0.001 | 0.452 | 0.040 |
| 34    | 0.003 | 0.077 | 0.071 | 0.170 | 0.001 | 0.568 | 0.038 |
| 35    | 0.008 | 0.171 | 0.053 | 0.166 | 0.001 | 0.505 | 0.049 |
| 36    | 0.203 | 0.194 | 0.035 | 0.056 | 0.001 | 0.357 | 0.068 |
| 37    | 0.063 | 0.131 | 0.010 | 0.015 | 0.001 | 0.255 | 0.252 |
| 38    | 0.006 | 0.192 | 0.019 | 0.006 | 0.001 | 0.186 | 0.292 |
| 39    | 0.026 | 0.394 | 0.018 | 0.005 | 0.000 | 0.152 | 0.107 |
| 40    | 0.062 | 0.376 | 0.015 | 0.004 | 0.000 | 0.099 | 0.101 |
| 41    | 0.069 | 0.328 | 0.004 | 0.002 | 0.000 | 0.021 | 0.000 |
| 42    | 0.004 | 0.021 | 0.000 | 0.000 | 0.000 | 0.000 | 0.000 |

Table S2. (Continuous Table)

| (ppp) | Para  | Anti  | 3-10  | Alpha | Pi    | Turn  | Bend  |
|-------|-------|-------|-------|-------|-------|-------|-------|
| 1     | 0.000 | 0.000 | 0.000 | 0.000 | 0.000 | 0.000 | 0.000 |
| 2     | 0.000 | 0.015 | 0.016 | 0.004 | 0.000 | 0.023 | 0.000 |
| 3     | 0.011 | 0.036 | 0.141 | 0.029 | 0.000 | 0.128 | 0.198 |
| 4     | 0.008 | 0.028 | 0.183 | 0.095 | 0.000 | 0.200 | 0.136 |
| 5     | 0.003 | 0.025 | 0.181 | 0.108 | 0.000 | 0.168 | 0.112 |
| 6     | 0.003 | 0.011 | 0.089 | 0.107 | 0.000 | 0.178 | 0.187 |
| 7     | 0.017 | 0.019 | 0.031 | 0.092 | 0.000 | 0.137 | 0.219 |
| 8     | 0.033 | 0.008 | 0.057 | 0.141 | 0.002 | 0.172 | 0.219 |
| 9     | 0.006 | 0.013 | 0.101 | 0.183 | 0.002 | 0.235 | 0.218 |
| 10    | 0.015 | 0.021 | 0.127 | 0.209 | 0.002 | 0.246 | 0.178 |
| 11    | 0.011 | 0.009 | 0.176 | 0.229 | 0.002 | 0.249 | 0.129 |
| 12    | 0.046 | 0.008 | 0.150 | 0.146 | 0.002 | 0.331 | 0.115 |
| 13    | 0.011 | 0.011 | 0.126 | 0.099 | 0.000 | 0.217 | 0.134 |
| 14    | 0.004 | 0.157 | 0.040 | 0.075 | 0.000 | 0.215 | 0.075 |
| 15    | 0.020 | 0.478 | 0.006 | 0.050 | 0.000 | 0.073 | 0.088 |
| 16    | 0.058 | 0.543 | 0.012 | 0.015 | 0.000 | 0.049 | 0.084 |
| 17    | 0.014 | 0.563 | 0.044 | 0.044 | 0.000 | 0.024 | 0.071 |
| 18    | 0.015 | 0.308 | 0.166 | 0.131 | 0.000 | 0.113 | 0.071 |
| 19    | 0.029 | 0.373 | 0.166 | 0.143 | 0.000 | 0.109 | 0.039 |
| 20    | 0.016 | 0.161 | 0.141 | 0.164 | 0.001 | 0.107 | 0.125 |
| 21    | 0.001 | 0.120 | 0.049 | 0.271 | 0.004 | 0.131 | 0.115 |
| 22    | 0.000 | 0.065 | 0.050 | 0.324 | 0.004 | 0.224 | 0.165 |
| 23    | 0.001 | 0.051 | 0.074 | 0.333 | 0.004 | 0.289 | 0.125 |
| 24    | 0.036 | 0.017 | 0.114 | 0.306 | 0.008 | 0.333 | 0.082 |
| 25    | 0.000 | 0.025 | 0.136 | 0.281 | 0.008 | 0.306 | 0.122 |
| 26    | 0.001 | 0.049 | 0.141 | 0.161 | 0.006 | 0.412 | 0.106 |
| 27    | 0.000 | 0.068 | 0.098 | 0.109 | 0.006 | 0.451 | 0.132 |
| 28    | 0.035 | 0.095 | 0.070 | 0.098 | 0.005 | 0.346 | 0.184 |
| 29    | 0.003 | 0.090 | 0.042 | 0.085 | 0.003 | 0.205 | 0.199 |
| 30    | 0.011 | 0.090 | 0.046 | 0.088 | 0.000 | 0.110 | 0.129 |
| 31    | 0.018 | 0.154 | 0.029 | 0.101 | 0.000 | 0.092 | 0.101 |
| 32    | 0.174 | 0.132 | 0.045 | 0.148 | 0.000 | 0.088 | 0.109 |
| 33    | 0.005 | 0.305 | 0.047 | 0.109 | 0.000 | 0.334 | 0.095 |
| 34    | 0.005 | 0.296 | 0.051 | 0.105 | 0.000 | 0.337 | 0.103 |
| 35    | 0.006 | 0.338 | 0.026 | 0.098 | 0.000 | 0.291 | 0.094 |
| 36    | 0.129 | 0.191 | 0.030 | 0.024 | 0.000 | 0.415 | 0.109 |
| 37    | 0.013 | 0.123 | 0.021 | 0.011 | 0.000 | 0.399 | 0.168 |
| 38    | 0.006 | 0.259 | 0.037 | 0.009 | 0.000 | 0.323 | 0.186 |
| 39    | 0.038 | 0.604 | 0.027 | 0.007 | 0.000 | 0.077 | 0.097 |
| 40    | 0.061 | 0.641 | 0.025 | 0.007 | 0.000 | 0.045 | 0.055 |
| 41    | 0.044 | 0.527 | 0.003 | 0.002 | 0.000 | 0.029 | 0.000 |
| 42    | 0.002 | 0.154 | 0.000 | 0.000 | 0.000 | 0.000 | 0.000 |

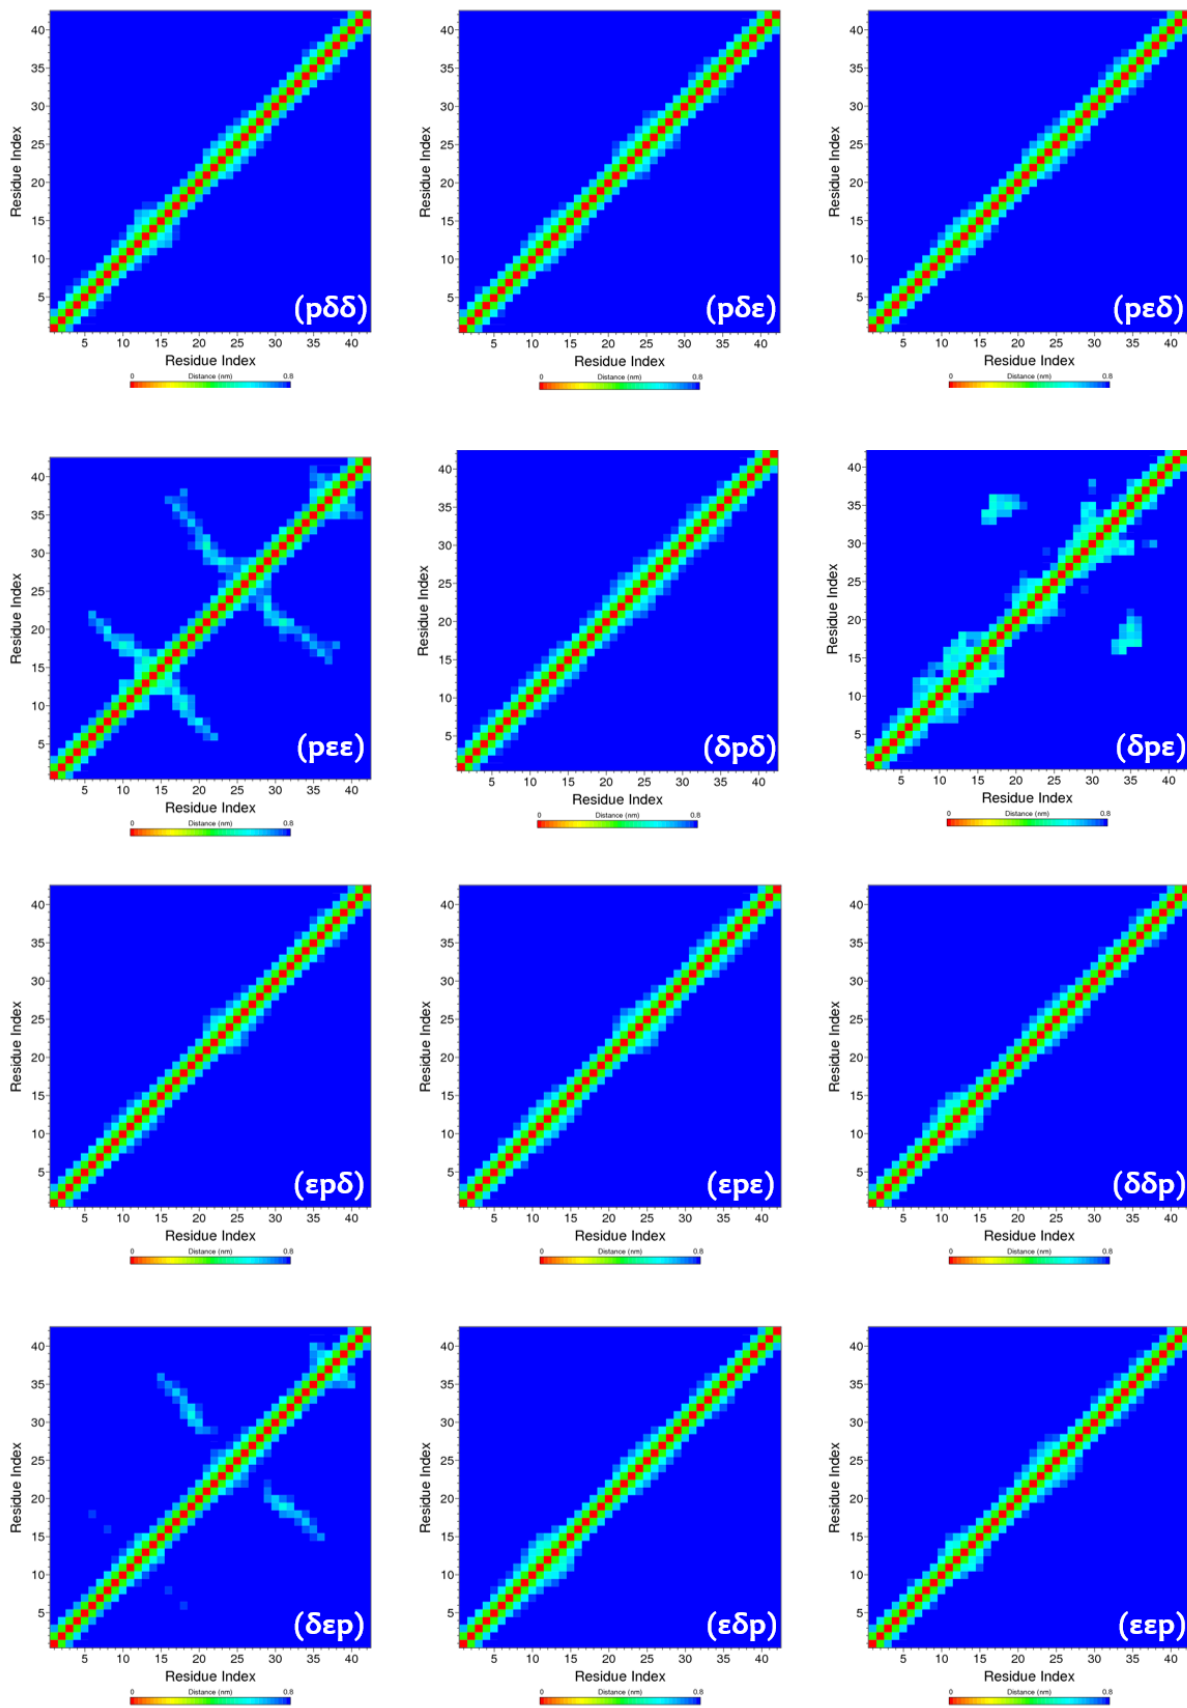

Figure S2. The contact map in each system.



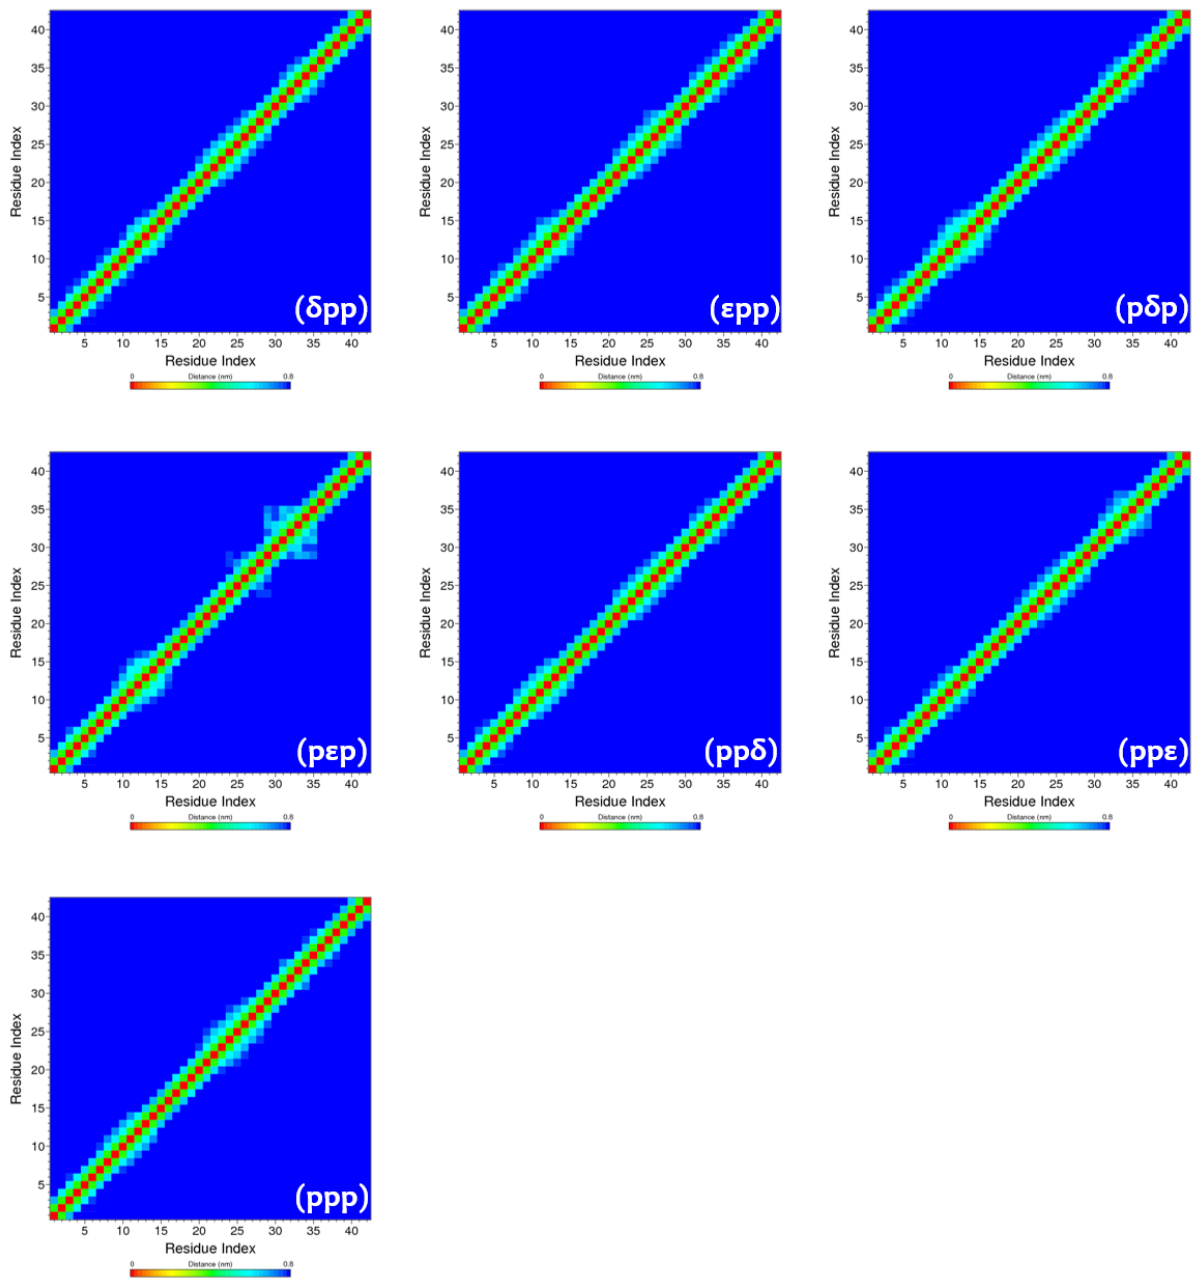

Figure S2. (Continuous figure)

Table S3. Possibility of H-bonding interaction between H6 and other residues in each system<sup>a</sup>.

|     | (pδδ) | (pδε) | (πεδ) | (πεε) | (δpδ) | (δπε) | (εpδ) | (επε) | (δδp) | (δεp) | (εδp) | (εεp) | (δpp) | (εpp) | (pδp) | (πεp) | (ppδ) | (ppe) | (ppp) |
|-----|-------|-------|-------|-------|-------|-------|-------|-------|-------|-------|-------|-------|-------|-------|-------|-------|-------|-------|-------|
| E3  | 0.113 | 0.089 | 0.077 |       | 0.111 | 0.104 |       | 0.070 | 0.070 | 0.108 | 0.082 |       | 0.094 | 0.060 | 0.104 | 0.097 | 0.111 | 0.091 | 0.091 |
| F4  |       |       |       | 0.197 |       |       |       |       |       |       |       |       |       |       |       |       |       |       |       |
| D7  | 0.104 | 0.084 | 0.089 |       | 0.054 | 0.117 |       |       |       |       |       |       | 0.056 |       | 0.103 | 0.115 | 0.093 | 0.107 | 0.083 |
| E11 |       | 0.062 |       |       |       |       |       |       |       |       |       |       |       |       |       |       |       |       | 0.082 |
| F19 |       |       |       |       | 0.057 |       |       |       |       |       |       |       |       |       |       |       |       |       |       |
| E22 |       |       |       | 0.123 |       |       |       |       |       |       |       |       |       |       |       |       |       |       |       |

<sup>a</sup> Only more than 5% possibility data was collected in the table.

Table S4. Possibility of H-bonding interaction between H13 and other residues in each system<sup>a</sup>.

|     | (pδδ) | (pδε) | (πεδ) | (πεε) | (δpδ) | (δπε) | (εpδ) | (επε) | (δδp) | (δεp) | (εδp) | (εεp) | (δpp) | (εpp) | (pδp) | (πεp) | (ppδ) | (ppe) | (ppp) |
|-----|-------|-------|-------|-------|-------|-------|-------|-------|-------|-------|-------|-------|-------|-------|-------|-------|-------|-------|-------|
| G9  | 0.075 | 0.086 |       |       | 0.089 |       | 0.052 |       | 0.124 |       | 0.157 |       |       |       | 0.148 |       | 0.075 |       |       |
| Y10 | 0.093 | 0.085 | 0.054 |       |       |       |       | 0.101 | 0.148 |       | 0.100 | 0.097 | 0.058 | 0.067 | 0.130 | 0.098 | 0.082 | 0.066 |       |
| Q15 | 0.061 |       |       |       |       |       |       |       |       |       |       |       |       |       |       |       |       |       |       |
| K16 | 0.163 | 0.069 | 0.090 | 0.161 | 0.085 | 0.593 |       |       |       |       | 0.053 |       |       | 0.174 | 0.073 |       |       |       |       |
| L17 |       |       | 0.064 |       | 0.058 | 0.645 |       |       |       |       | 0.054 |       |       | 0.211 | 0.072 | 0.067 |       |       |       |
| A42 |       |       |       |       | 0.059 |       |       |       |       |       |       |       | 0.063 |       |       |       | 0.052 |       |       |

<sup>a</sup> Only more than 5% possibility data was collected in the table.

Table S5. Possibility of H-bonding interaction between H14 and other residues in each system<sup>a</sup>.

|     | (pδδ) | (pδε) | (πεδ) | (πεε) | (δpδ) | (δπε) | (εpδ) | (επε) | (δδp) | (δεp) | (εδp) | (εεp) | (δpp) | (εpp) | (pδp) | (πεp) | (ppδ) | (ppe) | (ppp) |
|-----|-------|-------|-------|-------|-------|-------|-------|-------|-------|-------|-------|-------|-------|-------|-------|-------|-------|-------|-------|
| S8  |       |       |       |       |       |       |       |       |       |       |       | 0.077 |       |       | 0.067 |       |       |       |       |
| Y10 | 0.126 | 0.071 | 0.134 |       | 0.125 |       | 0.073 | 0.068 | 0.084 |       | 0.093 | 0.066 |       | 0.093 | 0.094 | 0.074 | 0.149 |       |       |
| E11 | 0.109 | 0.096 | 0.123 |       | 0.119 | 0.071 | 0.118 | 0.130 | 0.275 | 0.111 | 0.225 | 0.212 | 0.196 | 0.189 | 0.250 | 0.242 | 0.165 | 0.079 | 0.131 |
| V12 |       |       |       |       |       |       | 0.064 |       |       | 0.081 |       | 0.074 |       | 0.098 |       |       |       |       |       |
| L17 |       |       |       |       |       |       |       |       |       |       |       |       |       |       |       |       |       | 0.070 |       |
| A42 |       |       |       |       |       |       |       |       |       |       |       |       | 0.065 |       |       |       |       |       | 0.176 |

<sup>a</sup> Only more than 5% possibility data was collected in the table.

Table S6. The calculation of pKa for all three histidines in each system<sup>a</sup>.

|     | (pδδ) | (pδε) | (πεδ) | (πεε) | (δpδ) | (δπε) | (εpδ) | (επε) | (δδp) | (δεp) | (εδp) | (εεp) | (δpp) | (εpp) | (pδp) | (πεp) | (ppδ) | (ppe) | (ppp) |
|-----|-------|-------|-------|-------|-------|-------|-------|-------|-------|-------|-------|-------|-------|-------|-------|-------|-------|-------|-------|
| H6  | 7.23  | 6.36  | 7.62  | 7.89  | 7.45  | 6.93  | 6.36  | 6.50  | 7.32  | 6.50  | 6.36  | 6.43  | 7.23  | 6.43  | 6.52  | 7.23  | 7.26  | 7.77  | 7.23  |
| H13 | 7.51  | 6.50  | 6.43  | 6.43  | 7.30  | 7.61  | 8.03  | 7.32  | 6.50  | 6.50  | 6.86  | 6.50  | 6.50  | 7.86  | 6.50  | 6.50  | 7.54  | 7.27  | 7.09  |
| H14 | 7.30  | 6.50  | 6.82  | 6.43  | 7.23  | 6.50  | 6.44  | 6.50  | 8.04  | 6.60  | 7.30  | 7.23  | 7.30  | 7.80  | 6.64  | 7.23  | 7.57  | 6.50  | 6.94  |

Table S7. PCC and RMSD between our REMD-Calculated and Experimental  ${}^3J_{\text{HNHA}}$ -Coupling Constants<sup>a</sup>.

| System                   | PCC   | RMSD(Hz) |
|--------------------------|-------|----------|
| (p $\delta\delta$ )      | 0.454 | 0.503    |
| (p $\delta\epsilon$ )    | 0.471 | 0.473    |
| (p $\epsilon\delta$ )    | 0.497 | 0.463    |
| (p $\epsilon\epsilon$ )  | 0.125 | 0.845    |
| ( $\delta p\delta$ )     | 0.373 | 0.469    |
| ( $\delta p\epsilon$ )   | 0.600 | 0.428    |
| ( $\epsilon p\delta$ )   | 0.536 | 0.473    |
| ( $\epsilon p\epsilon$ ) | 0.405 | 0.468    |
| ( $\delta\delta p$ )     | 0.379 | 0.488    |
| ( $\delta\epsilon p$ )   | 0.505 | 0.630    |
| ( $\epsilon\delta p$ )   | 0.399 | 0.461    |
| ( $\epsilon\epsilon p$ ) | 0.416 | 0.481    |
| ( $\delta p p$ )         | 0.423 | 0.474    |
| ( $\epsilon p p$ )       | 0.350 | 0.472    |
| (p $\delta p$ )          | 0.365 | 0.472    |
| (p $\epsilon p$ )        | 0.347 | 0.563    |
| (p p $\delta$ )          | 0.473 | 0.445    |
| (p p $\epsilon$ )        | 0.398 | 0.483    |
| (p p p)                  | 0.461 | 0.459    |

<sup>a</sup> PCC is derived from averaged  ${}^3J_{\text{HNHA}}$ -coupling constant between simulated and experimental data. RMSD is the standard deviation by calculating the averaged deviation between simulated and experimental data.
